# Supplementary material for: A growth reference for mid upper arm circumference for age among school age children and adolescents, and validation for mortality: growth curve construction and longitudinal cohort study
Source: PubMed Central journal article supplement (PMC5541507; doi:10.1136/bmj.j3423), 2017-08-03
Supplement: mral036206.ww1.pdf [file mral036206.ww1.pdf]

# Supplementary file

## **A Growth Reference for Mid Upper Arm Circumference for Age among School Age Children and Adolescents, with Validation for Mortality in Two Cohorts.**

Lazarus Mramba, Moses Ngari, Martha Mwangome, Lilian Muchai, Evasius Bauni, A Sarah Walker, Diana M Gibb, Gregory Fegan, James A Berkley.

### Supplementary Tables & Figures

|                                                                                                                                                                                          |    |
|------------------------------------------------------------------------------------------------------------------------------------------------------------------------------------------|----|
| Supplementary Table 1: Deviance, Akaike Information Criteria, and Bayesian Information Criteria values for competing models. ....                                                        | 2  |
| Supplementary Table 2: Cross tabulation of MUAC and BMI-for-age Z scores amongst children in the ARROW trial.....                                                                        | 2  |
| Supplementary Table 3: Areas under Receiver Operating Characteristic Curves for children in the ARROW trial by age and sex. ....                                                         | 3  |
| Supplementary Table 4: Simplified cut off values for MUAC-for-Age. ....                                                                                                                  | 4  |
| Supplementary Table 5: Exploratory analysis of simplified cut offs for MUAC-for-Age, discriminatory performance for mortality in the ARROW trial.....                                    | 5  |
| Supplementary Table 6: Cross tabulation of MUAC and BMI-for-age Z scores amongst children admitted to Kilifi County Hospital, Kenya and followed up post-discharge. ....                 | 5  |
| Supplementary Table 7: Areas under Receiver Operating Characteristic Curves for children among children discharged from Kilifi County Hospital by sex. ....                              | 6  |
| Supplementary Table 8: Exploratory analysis of simplified cut offs for MUAC-for-Age, discriminatory performance for mortality among children discharged from Kilifi County Hospital. ... | 6  |
| Supplementary Figure 1: Merged data and modelled Z Scores. ....                                                                                                                          | 7  |
| Supplementary Figure 2: Residual plots for BCCG models. ....                                                                                                                             | 8  |
| Supplementary Figure 4: Worm plots for BCCG models ....                                                                                                                                  | 9  |
| Supplementary Figure 7: A simplified MUAC cut-off compared to -2 & -3Z Scores. ....                                                                                                      | 10 |
| Supplementary Figure 8: MUAC values identified by MUACz <-2, a simplified MUAC cut-off, and BMIz <-2 in the ARROW trial. ....                                                            | 11 |
| Supplementary Figure 9: MUAC values identified by MUACz <-2, a simplified MUAC cut-off, and BMIz <-2 among children discharged from Kilifi County Hospital.....                          | 12 |

### MUAC-for-Age Z Score and Percentile Tables

|                                           |    |
|-------------------------------------------|----|
| Z score values for girls and boys.....    | 13 |
| Percentile values for girls and boys..... | 19 |

Supplementary Table 1: Deviance, Akaike Information Criteria, and Bayesian Information Criteria values for competing models.

|                                                             | <b>Deviance</b> | <b>AIC (df)</b> | <b>BIC (df)</b> |
|-------------------------------------------------------------|-----------------|-----------------|-----------------|
| <b>Models for Girls</b><br>(values displayed minus 120,000) |                 |                 |                 |
| BCT                                                         | 302.3           | 335.6 (16.7)    | 474.0 (16.7)    |
| BCPE                                                        | 196.8           | 267.6 (35.4)    | 561.5 (35.4)    |
| BCCG                                                        | 300.7           | 334.4 (16.8)    | 473.9 (16.8)    |
| <b>Models for Boys</b><br>(values displayed minus 114,000)  |                 |                 |                 |
| BCT                                                         | 127.6           | 173.0 (22.7)    | 361.3 (22.7)    |
| BCPE                                                        | 112.5           | 175.6 (31.6)    | 437.2 (31.6)    |
| BCCG                                                        | 221.4           | 265.3 (21.9)    | 447.2 (21.9)    |

BCT (Box-Cox t distribution); BCPE (Box-Cox Power Exponential); BCCG (Box-Cox-Cole-Green)

BCT and BCPE transformations model both skewness and kurtosis, while BCCG accounts for skewness only. They typically differ in how outliers are represented. BCCG allows the parameters: L (transformation), M (median) and S (skew) to be interpretable as characteristics of the original data, and thereby used in typical anthropometric software, such as WHO Anthro. This output has also been achieved by using BCT and BPPE with fixed value for kurtosis to eliminate it (effectively the BCCG method), or by generating LMS values derived from the final smoothed curves irrespective of methods used to model the original data.

Supplementary Table 2: Cross tabulation of MUAC and BMI-for-age Z scores amongst children in the ARROW trial.

| <b>All children</b>         | <b>BMI-for-age Z score</b> |                 |               |              |     |
|-----------------------------|----------------------------|-----------------|---------------|--------------|-----|
|                             | <b>-2 or more</b>          | <b>-3 to -2</b> | <b>&lt;-3</b> | <b>Total</b> |     |
| <b>-2 or more</b>           | 455                        | 9               | 3             | 467          |     |
| <b>-3 to -2</b>             | 95                         | 20              | 3             | 118          |     |
| <b>MUAC for age Z score</b> | <b>&lt;-3</b>              | 33              | 29            | 38           | 100 |
|                             | <b>Total</b>               | 583             | 58            | 44           | 685 |

  

| <b>Children that died</b>   | <b>BMI-for-age Z score</b> |                 |               |              |    |
|-----------------------------|----------------------------|-----------------|---------------|--------------|----|
|                             | <b>-2 or more</b>          | <b>-3 to -2</b> | <b>&lt;-3</b> | <b>Total</b> |    |
| <b>-2 or more</b>           | 4                          | 0               | 0             | 4            |    |
| <b>-3 to -2</b>             | 3                          | 0               | 1             | 4            |    |
| <b>MUAC for age Z score</b> | <b>&lt;-3</b>              | 2               | 2             | 6            | 10 |
|                             | <b>Total</b>               | 9               | 2             | 7            | 18 |

Supplementary Table 3: Areas under Receiver Operating Characteristic Curves for children in the ARROW trial by age and sex.

| 5 to 9 year olds     |                        |                        | 10 to 17 year olds |                        |                        |     |
|----------------------|------------------------|------------------------|--------------------|------------------------|------------------------|-----|
|                      | MUACz                  | BMIz                   | P**                | MUACz                  | BMIz                   | P** |
| <b>n</b>             | 436                    | 436                    |                    | 249                    | 249                    |     |
| <b>AUC (95% CI)*</b> | 0.75<br>(0.54 to 0.95) | 0.61<br>(0.41 to 0.80) | 0.3                | 0.85<br>(0.74 to 0.96) | 0.80<br>(0.66 to 0.94) | 0.4 |

  

| Boys                 |                        |                        | Girls |                                     |                                      |     |
|----------------------|------------------------|------------------------|-------|-------------------------------------|--------------------------------------|-----|
|                      | MUACz                  | BMIz                   | P**   | MUACz                               | BMIz                                 | P** |
| <b>n</b>             | 436                    | 436                    |       | 249                                 | 249                                  |     |
| <b>AUC (95% CI)*</b> | 0.76<br>(0.59 to 0.92) | 0.69<br>(0.53 to 0.85) | 0.4   | 0.87 <sup>†</sup><br>(0.75 to 0.99) | 0.84 <sup>††</sup><br>(0.68 to 0.99) | 0.6 |

  

| Boys                 |                        |                        | Girls          |                        |                        |                |
|----------------------|------------------------|------------------------|----------------|------------------------|------------------------|----------------|
|                      | 5 to 9y                | 10 to 17y              | P <sup>§</sup> | 5 to 9y                | 10 to 17y              | P <sup>§</sup> |
|                      | MUACz                  | MUACz                  |                | MUACz                  | MUACz                  |                |
| <b>n</b>             | 224                    | 117                    |                | 211                    | 133                    |                |
| <b>AUC (95% CI)*</b> | 0.71<br>(0.45 to 0.97) | 0.81<br>(0.60 to 0.99) | 0.6            | 0.85<br>(0.58 to 0.99) | 0.89<br>(0.74 to 0.99) | 0.5            |

\* AUC: area under the receiver operating characteristic curve

\*\* P values for MUACz vs. BMIz

† MUACz (boys) vs MUACz (girls) P=0.2

†† BMIz (boys) vs BMIz (girls) P=0.2

§ P values 5 to 9 year olds vs. 10 to 17 year olds

Supplementary Table 4: Simplified cut off values for MUAC-for-Age.

| <b>Age in years</b> | <b>Simplified MUAC cut off</b> |
|---------------------|--------------------------------|
| (6m to 4y)          | (12.5)                         |
| 5                   | 13.1                           |
| 6                   | 13.6                           |
| 7                   | 14.2                           |
| 8                   | 14.8                           |
| 9                   | 15.3                           |
| 10                  | 15.9                           |
| 11                  | 16.5                           |
| 12                  | 17.0                           |
| 13                  | 17.6                           |
| 14                  | 18.2                           |
| 15                  | 18.7                           |
| 16                  | 19.3                           |
| 17                  | 19.9                           |
| 18                  | 20.4                           |
| 19                  | 21.0                           |

Simplified cut off values are assigned according to age in completed years in a linear slope from 12.5cm at <5 years to 21cm at 19 years, which are commonly used fixed MUAC cut offs for young children and adults. The formula is:

$$cutoff = 12.5 + \left( \frac{17}{30} * (age\ in\ years - 4) \right)$$

Supplementary Table 5: Exploratory analysis of simplified cut offs for MUAC-for-Age, discriminatory performance for mortality in the ARROW trial.

|                                               | MUAC <SCO*<br>N=685    | MUACz continuous<br>N=685 | MUACz <-3<br>N=685    | MUACz <-2<br>N=685     | BMIz <-2<br>N=685      |
|-----------------------------------------------|------------------------|---------------------------|-----------------------|------------------------|------------------------|
| <b>Number identified<br/>(%, caseload)</b>    | 164 (24)               | -                         | 100 (15)              | 218 (32)               | 102 (15)               |
| <b>Deaths identified<br/>(%, sensitivity)</b> | 13 (72)                | -                         | 10 (56)               | 14 (7)                 | 9 (50)                 |
| <b>Hazard ratio for death<br/>(95% CI)**</b>  | 9.1<br>(2.86 – 23.0)   | -                         | 11.1<br>(3.40 – 36.0) | 3.63<br>(0.90 – 14.7)  | 1.91<br>(0.41 – 8.91)  |
| <b>AUC (95% CI)†</b>                          | 0.75<br>(0.64 to 0.86) | 0.81<br>(0.70 to 0.92)    | 0.71<br>(0.59 – 0.83) | 0.74<br>(0.64 to 0.84) | 0.68<br>(0.56 to 0.80) |
| <b>P value‡</b>                               | -                      | 0.1                       | 0.4                   | 0.8                    | 0.2                    |

\* SCO: Simplified Cut Off

\*\* Adjusted for age and sex

† AUC: area under the receiver operating characteristic curve

‡ P value for AUCs compared to Simplified Cut Off

Supplementary Table 6: Cross tabulation of MUAC and BMI-for-age Z scores amongst children admitted to Kilifi County Hospital, Kenya and followed up post-discharge.

| All children             | BMI-for-age Z score |            |            |           |              |
|--------------------------|---------------------|------------|------------|-----------|--------------|
|                          | -2 or more          | -3 to -2   | <-3        | Missing   | Total        |
| -2 or more               | 881                 | 81         | 43         | 28        | 1033         |
| -3 to -2                 | 270                 | 114        | 33         | 8         | 425          |
| MUAC for age Z score <-3 | 97                  | 82         | 90         | 6         | 275          |
| Missing                  | 8                   | 0          | 0          | 0         | 8            |
| <b>Total</b>             | <b>1,256</b>        | <b>277</b> | <b>166</b> | <b>42</b> | <b>1,741</b> |

  

| Children that died       | BMI-for-age Z score |          |           |          |           |
|--------------------------|---------------------|----------|-----------|----------|-----------|
|                          | -2 or more          | -3 to -2 | <-3       | Missing  | Total     |
| -2 or more               | 12                  | 1        | 0         | 0        | 13        |
| -3 to -2                 | 9                   | 2        | 2         | 0        | 13        |
| MUAC for age Z score <-3 | 7                   | 3        | 10        | 0        | 20        |
| Missing                  | 0                   | 0        | 0         | 0        | 0         |
| <b>Total</b>             | <b>28</b>           | <b>6</b> | <b>12</b> | <b>0</b> | <b>46</b> |

Supplementary Table 7: Areas under Receiver Operating Characteristic Curves for children among children discharged from Kilifi County Hospital by sex.

|                      | Boys aged 5 to 13 years |                        |      | Girls aged 5 to 13 years |                          |       |
|----------------------|-------------------------|------------------------|------|--------------------------|--------------------------|-------|
|                      | MUACz                   | BMIz                   | P**  | MUACz                    | BMIz                     | P**   |
| <b>n</b>             | 944                     | 436                    |      | 736                      | 249                      |       |
| <b>AUC (95% CI)*</b> | 0.68<br>(0.57 to 0.78)  | 0.52<br>(0.39 to 0.66) | 0.01 | 0.80 †<br>(0.71 to 0.89) | 0.64 §<br>(0.53 to 0.76) | 0.003 |

\* AUC: area under the receiver operating characteristic curve

\*\* P value for MUACz vs. BMIz AUCs

† MUACz (all boys) vs MUACz (all girls) P=0.09

§ BMIz (all boys) vs BMIz (all girls) P=0.2

Supplementary Table 8: Exploratory analysis of simplified cut offs for MUAC-for-Age, discriminatory performance for mortality among children discharged from Kilifi County Hospital.

|                                          | MUAC <SCO*<br>N=1,680  | MUACz continuous<br>N=1,680 | MUACz <-3<br>N=1,680  | MUACz <-2<br>N=1,680   | BMIz <-2<br>N=1,633    |
|------------------------------------------|------------------------|-----------------------------|-----------------------|------------------------|------------------------|
| <b>Number identified (% caseload)</b>    | 488 (29)               | -                           | 275 (16)              | 700 (40)               | 435 (26)               |
| <b>Deaths identified (% sensitivity)</b> | 23 (50)                | -                           | 20 (43)               | 33 (72)                | 18 (39)                |
| <b>Hazard ratio for death (95% CI)**</b> | 2.25<br>(1.23 – 4.1)   | -                           | 3.74<br>(2.02 to 6.9) | 3.35<br>(1.74 to 6.5)  | 1.78<br>(0.97 – 3.27)  |
| <b>AUC (95% CI) †</b>                    | 0.61<br>(0.53 to 0.68) | 0.73<br>(0.65 to 0.80)      | 0.64<br>(0.57 – 0.72) | 0.66<br>(0.59 to 0.73) | 0.57<br>(0.50 to 0.64) |
| <b>P value §</b>                         | -                      | <0.0001                     | 0.09                  | 0.06                   | 0.2                    |

\* SCO: Simplified Cut Off

\*\* Adjusted for age, sex and HIV status

† AUC: area under the receiver operating characteristic curve

§ P value for AUC compared to Simplified Cut Off

Supplementary Figure 1: Merged data and modelled Z Scores.

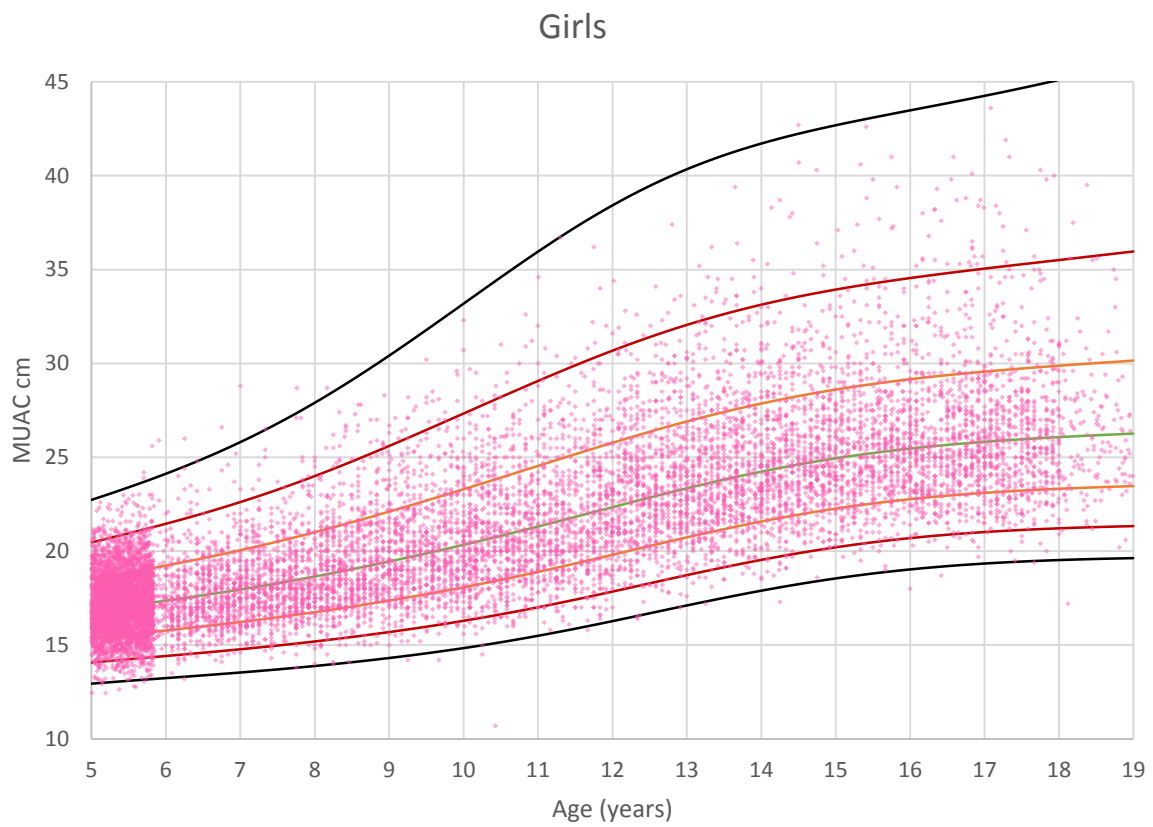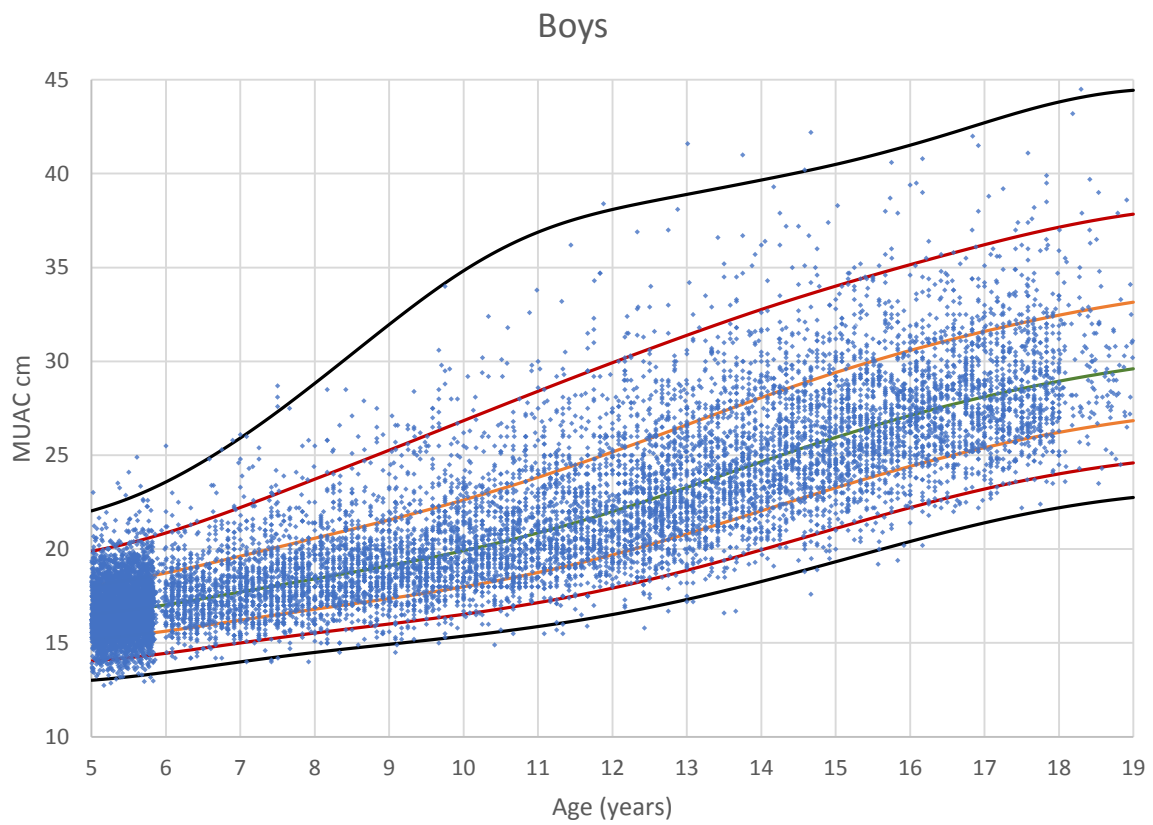

Supplementary Figure 2: Residual plots for BCCG models.

**Girls**

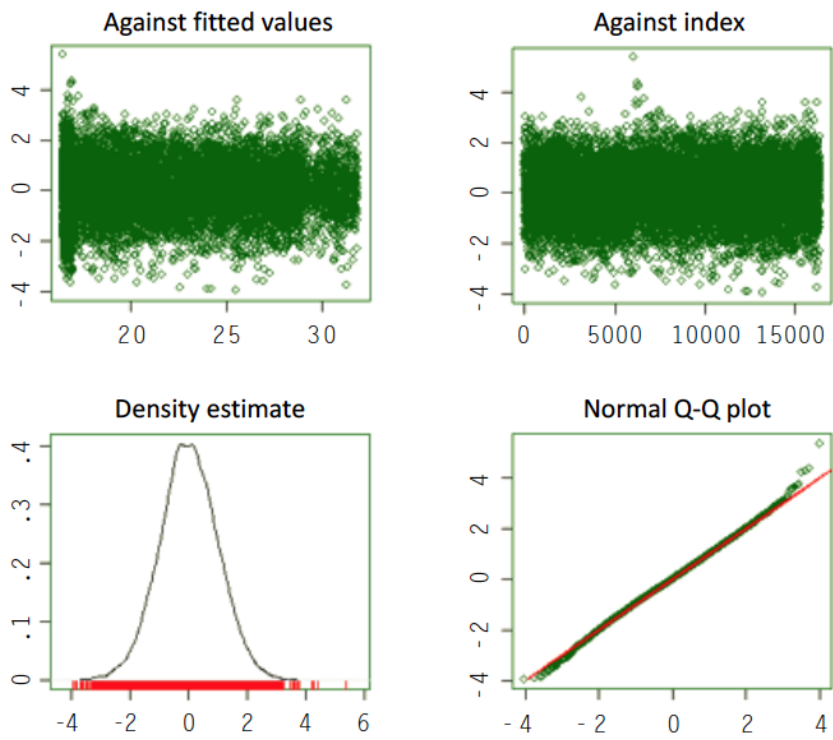

**Boys**

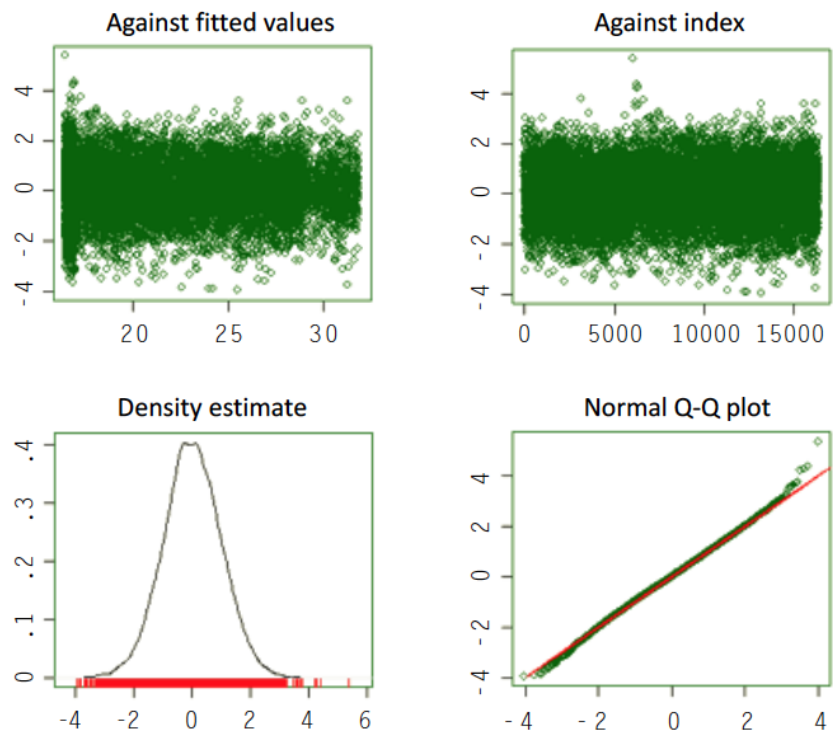



Supplementary Figure 4: Worm plots for BCCG models

**Girls**

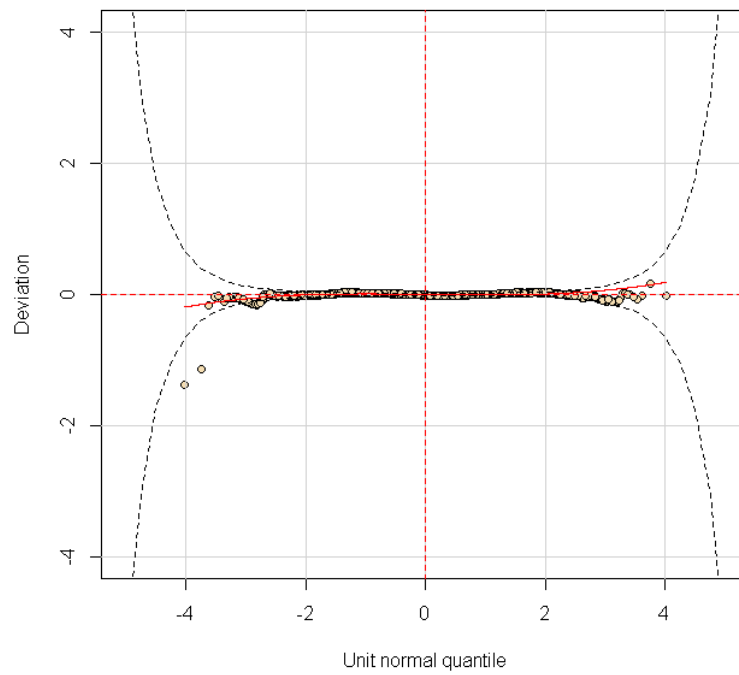

**Boys**

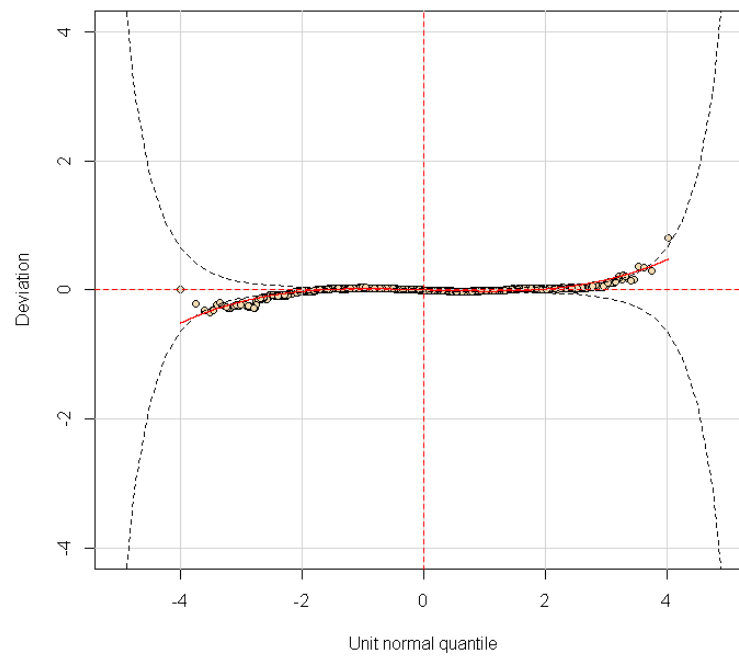

Supplementary Figure 7: A simplified MUAC cut-off compared to -2 & -3Z Scores.

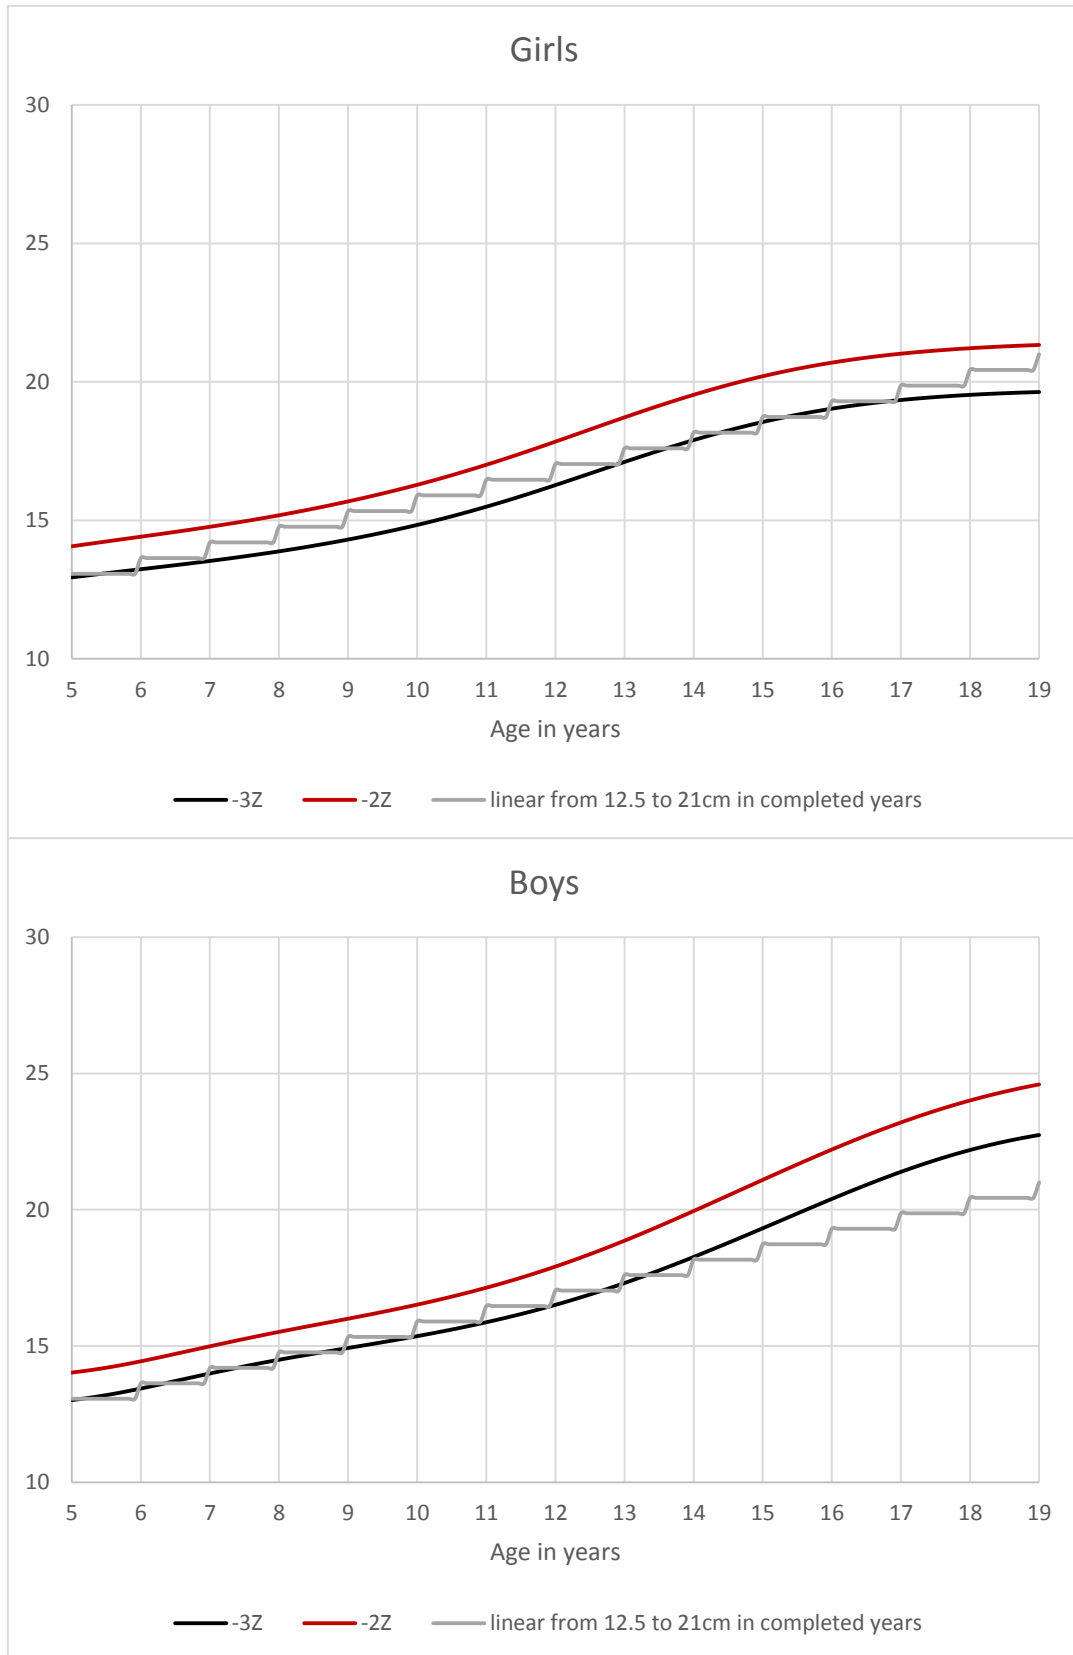

Supplementary Figure 8: MUAC values identified by MUACz <-2, a simplified MUAC cut-off, and BMIz <-2 in the ARROW trial.

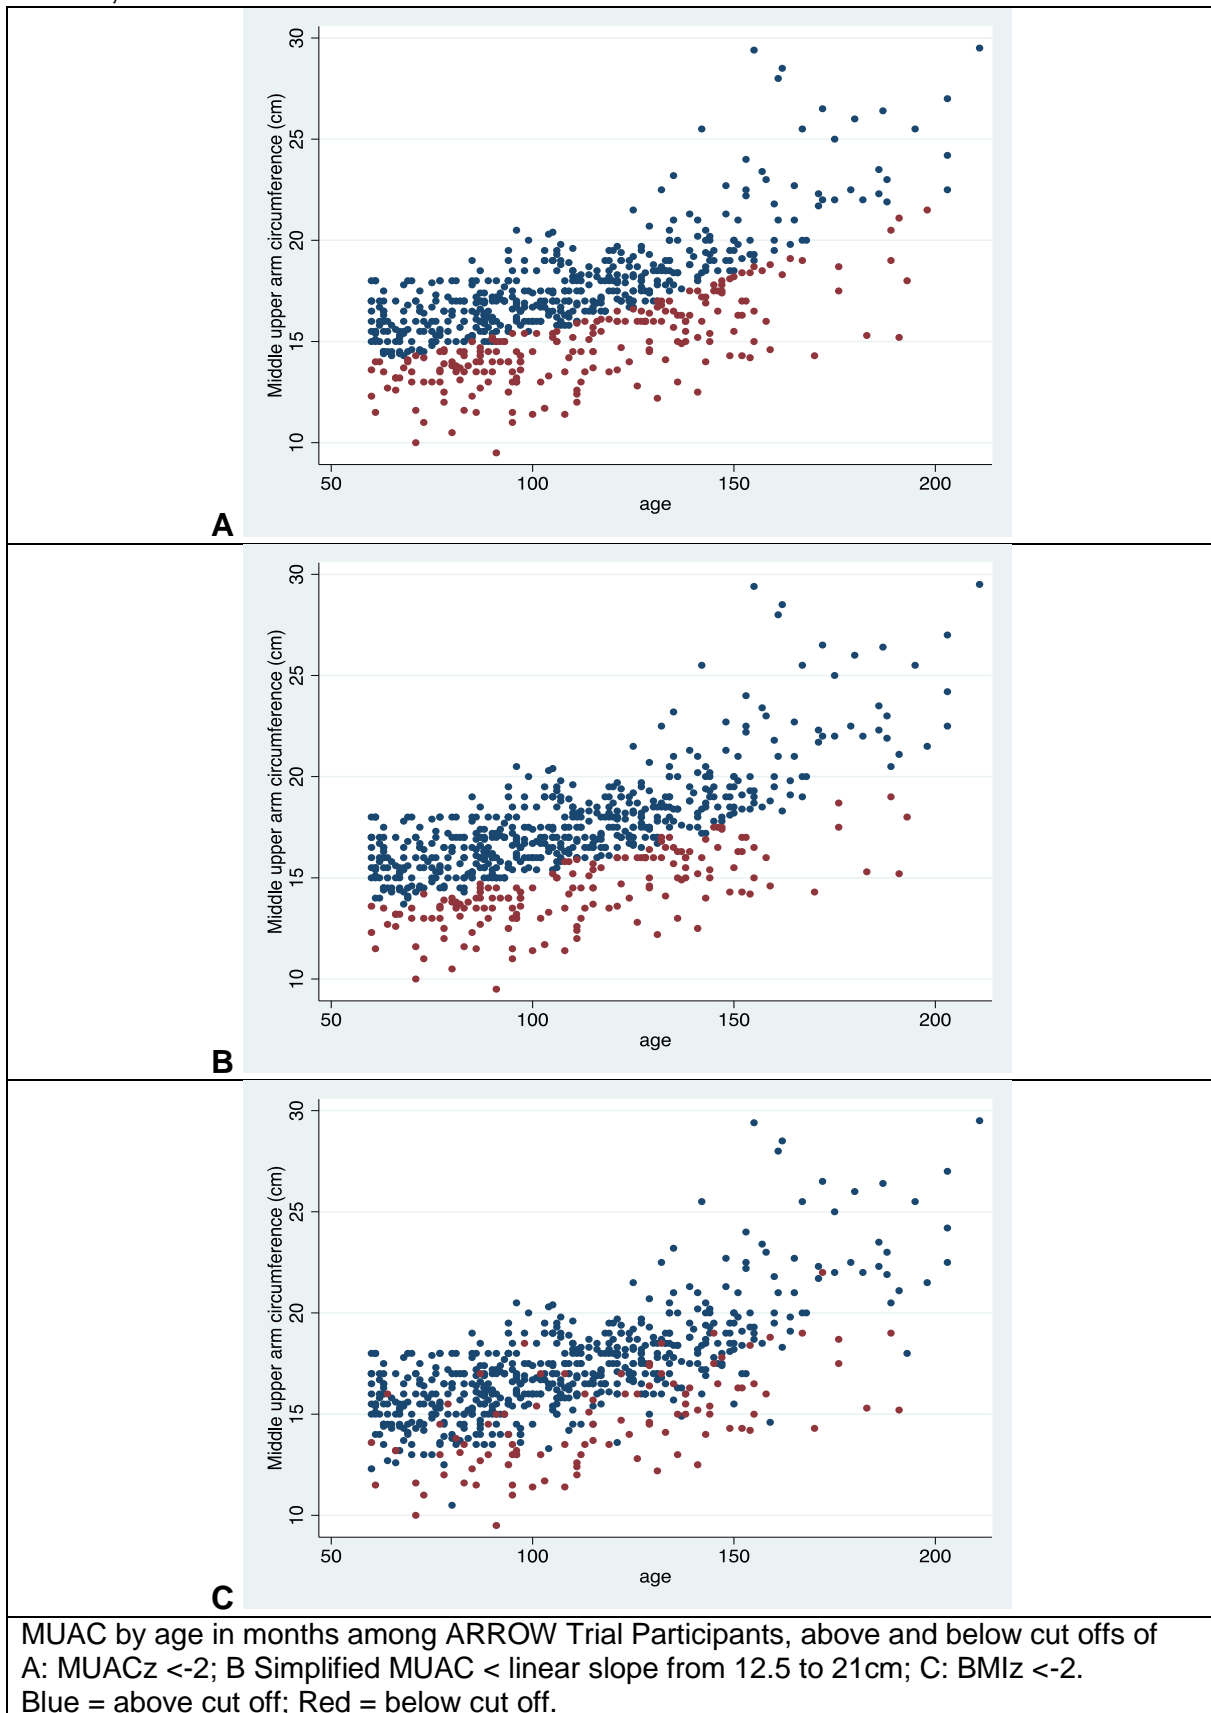

Supplementary Figure 9: MUAC values identified by MUACz <-2, a simplified MUAC cut-off, and BM1z <-2 among children discharged from Kilifi County Hospital.

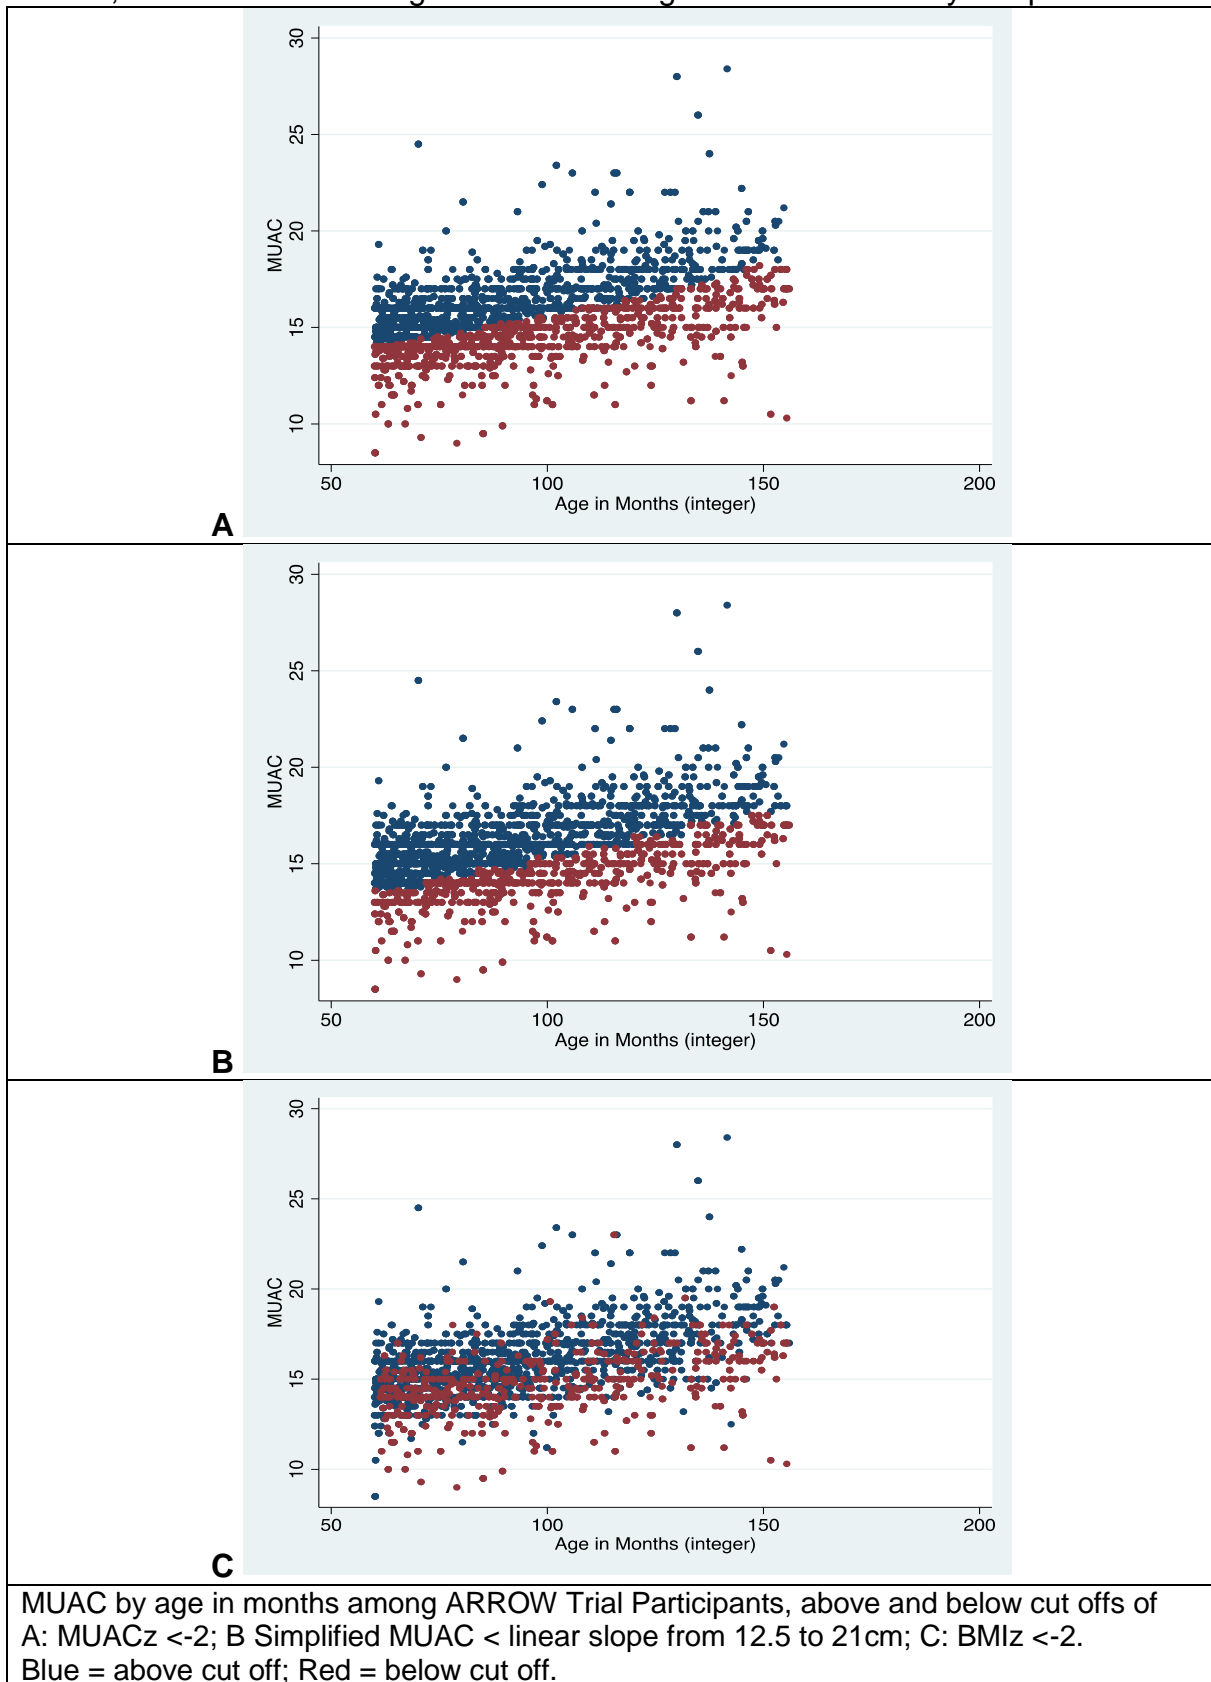

## Mid-upper arm circumference-for-age BOYS (5 to 19 years)

| Year:Month | Month | L        | M        | S       | Z Scores (MUAC in cm) |      |      |      |      |      |      |
|------------|-------|----------|----------|---------|-----------------------|------|------|------|------|------|------|
|            |       |          |          |         | -3                    | -2   | -1   | 0    | +1   | +2   | +3   |
| 5 : 0      | 60    | -0.72895 | 16.51891 | 0.08670 | 13.0                  | 14.0 | 15.2 | 16.5 | 18.1 | 19.9 | 22.0 |
| 5 : 1      | 61    | -0.75845 | 16.55158 | 0.08699 | 13.0                  | 14.1 | 15.2 | 16.6 | 18.1 | 19.9 | 22.1 |
| 5 : 2      | 62    | -0.78927 | 16.58562 | 0.08728 | 13.1                  | 14.1 | 15.2 | 16.6 | 18.2 | 20.0 | 22.2 |
| 5 : 3      | 63    | -0.82138 | 16.62121 | 0.08758 | 13.1                  | 14.1 | 15.3 | 16.6 | 18.2 | 20.1 | 22.3 |
| 5 : 4      | 64    | -0.85473 | 16.65854 | 0.08789 | 13.1                  | 14.1 | 15.3 | 16.7 | 18.3 | 20.2 | 22.5 |
| 5 : 5      | 65    | -0.88928 | 16.69781 | 0.08819 | 13.2                  | 14.2 | 15.3 | 16.7 | 18.3 | 20.2 | 22.6 |
| 5 : 6      | 66    | -0.92496 | 16.73915 | 0.08851 | 13.2                  | 14.2 | 15.4 | 16.7 | 18.4 | 20.3 | 22.7 |
| 5 : 7      | 67    | -0.96164 | 16.78248 | 0.08882 | 13.2                  | 14.2 | 15.4 | 16.8 | 18.4 | 20.4 | 22.8 |
| 5 : 8      | 68    | -0.99919 | 16.82768 | 0.08915 | 13.3                  | 14.3 | 15.5 | 16.8 | 18.5 | 20.5 | 23.0 |
| 5 : 9      | 69    | -1.03745 | 16.87463 | 0.08948 | 13.3                  | 14.3 | 15.5 | 16.9 | 18.5 | 20.6 | 23.1 |
| 5 : 10     | 70    | -1.07629 | 16.92319 | 0.08981 | 13.4                  | 14.4 | 15.5 | 16.9 | 18.6 | 20.7 | 23.3 |
| 5 : 11     | 71    | -1.11556 | 16.97324 | 0.09015 | 13.4                  | 14.4 | 15.6 | 17.0 | 18.7 | 20.8 | 23.4 |
| 6 : 0      | 72    | -1.15511 | 17.02466 | 0.09049 | 13.4                  | 14.4 | 15.6 | 17.0 | 18.7 | 20.9 | 23.6 |
| 6 : 1      | 73    | -1.19480 | 17.07731 | 0.09084 | 13.5                  | 14.5 | 15.7 | 17.1 | 18.8 | 21.0 | 23.7 |
| 6 : 2      | 74    | -1.23449 | 17.13106 | 0.09120 | 13.5                  | 14.5 | 15.7 | 17.1 | 18.9 | 21.1 | 23.9 |
| 6 : 3      | 75    | -1.27403 | 17.18581 | 0.09156 | 13.6                  | 14.6 | 15.8 | 17.2 | 18.9 | 21.2 | 24.1 |
| 6 : 4      | 76    | -1.31328 | 17.24140 | 0.09193 | 13.6                  | 14.6 | 15.8 | 17.2 | 19.0 | 21.3 | 24.3 |
| 6 : 5      | 77    | -1.35210 | 17.29773 | 0.09231 | 13.7                  | 14.7 | 15.9 | 17.3 | 19.1 | 21.4 | 24.5 |
| 6 : 6      | 78    | -1.39034 | 17.35466 | 0.09269 | 13.7                  | 14.7 | 15.9 | 17.4 | 19.2 | 21.5 | 24.7 |
| 6 : 7      | 79    | -1.42785 | 17.41207 | 0.09308 | 13.8                  | 14.8 | 16.0 | 17.4 | 19.2 | 21.6 | 24.9 |
| 6 : 8      | 80    | -1.46450 | 17.46982 | 0.09347 | 13.8                  | 14.8 | 16.0 | 17.5 | 19.3 | 21.7 | 25.1 |
| 6 : 9      | 81    | -1.50018 | 17.52784 | 0.09388 | 13.9                  | 14.9 | 16.1 | 17.5 | 19.4 | 21.9 | 25.3 |
| 6 : 10     | 82    | -1.53485 | 17.58607 | 0.09428 | 13.9                  | 14.9 | 16.1 | 17.6 | 19.5 | 22.0 | 25.5 |
| 6 : 11     | 83    | -1.56850 | 17.64449 | 0.09470 | 13.9                  | 14.9 | 16.2 | 17.6 | 19.5 | 22.1 | 25.7 |
| 7 : 0      | 84    | -1.60108 | 17.70307 | 0.09512 | 14.0                  | 15.0 | 16.2 | 17.7 | 19.6 | 22.2 | 25.9 |
| 7 : 1      | 85    | -1.63258 | 17.76178 | 0.09555 | 14.0                  | 15.0 | 16.3 | 17.8 | 19.7 | 22.3 | 26.1 |
| 7 : 2      | 86    | -1.66297 | 17.82059 | 0.09598 | 14.1                  | 15.1 | 16.3 | 17.8 | 19.8 | 22.5 | 26.4 |
| 7 : 3      | 87    | -1.69222 | 17.87946 | 0.09642 | 14.1                  | 15.1 | 16.4 | 17.9 | 19.9 | 22.6 | 26.6 |
| 7 : 4      | 88    | -1.72030 | 17.93836 | 0.09687 | 14.2                  | 15.2 | 16.4 | 17.9 | 19.9 | 22.7 | 26.8 |
| 7 : 5      | 89    | -1.74719 | 17.99727 | 0.09732 | 14.2                  | 15.2 | 16.5 | 18.0 | 20.0 | 22.8 | 27.1 |
| 7 : 6      | 90    | -1.77285 | 18.05615 | 0.09778 | 14.3                  | 15.3 | 16.5 | 18.1 | 20.1 | 23.0 | 27.3 |
| 7 : 7      | 91    | -1.79727 | 18.11498 | 0.09824 | 14.3                  | 15.3 | 16.5 | 18.1 | 20.2 | 23.1 | 27.6 |
| 7 : 8      | 92    | -1.82040 | 18.17371 | 0.09871 | 14.3                  | 15.4 | 16.6 | 18.2 | 20.3 | 23.2 | 27.8 |
| 7 : 9      | 93    | -1.84224 | 18.23233 | 0.09918 | 14.4                  | 15.4 | 16.6 | 18.2 | 20.3 | 23.3 | 28.1 |
| 7 : 10     | 94    | -1.86274 | 18.29080 | 0.09966 | 14.4                  | 15.4 | 16.7 | 18.3 | 20.4 | 23.5 | 28.3 |
| 7 : 11     | 95    | -1.88189 | 18.34908 | 0.10014 | 14.5                  | 15.5 | 16.7 | 18.3 | 20.5 | 23.6 | 28.6 |
| 8 : 0      | 96    | -1.89968 | 18.40721 | 0.10063 | 14.5                  | 15.5 | 16.8 | 18.4 | 20.6 | 23.7 | 28.8 |
| 8 : 1      | 97    | -1.91614 | 18.46524 | 0.10112 | 14.5                  | 15.6 | 16.8 | 18.5 | 20.7 | 23.8 | 29.1 |
| 8 : 2      | 98    | -1.93128 | 18.52324 | 0.10162 | 14.6                  | 15.6 | 16.9 | 18.5 | 20.7 | 24.0 | 29.3 |
| 8 : 3      | 99    | -1.94514 | 18.58127 | 0.10211 | 14.6                  | 15.6 | 16.9 | 18.6 | 20.8 | 24.1 | 29.6 |
| 8 : 4      | 100   | -1.95773 | 18.63939 | 0.10262 | 14.6                  | 15.7 | 17.0 | 18.6 | 20.9 | 24.2 | 29.9 |
| 8 : 5      | 101   | -1.96908 | 18.69765 | 0.10312 | 14.7                  | 15.7 | 17.0 | 18.7 | 21.0 | 24.4 | 30.1 |
| 8 : 6      | 102   | -1.97920 | 18.75613 | 0.10363 | 14.7                  | 15.8 | 17.1 | 18.8 | 21.1 | 24.5 | 30.4 |
| 8 : 7      | 103   | -1.98813 | 18.81489 | 0.10414 | 14.8                  | 15.8 | 17.1 | 18.8 | 21.1 | 24.6 | 30.7 |
| 8 : 8      | 104   | -1.99588 | 18.87398 | 0.10465 | 14.8                  | 15.8 | 17.2 | 18.9 | 21.2 | 24.7 | 30.9 |
| 8 : 9      | 105   | -2.00248 | 18.93347 | 0.10516 | 14.8                  | 15.9 | 17.2 | 18.9 | 21.3 | 24.9 | 31.2 |
| 8 : 10     | 106   | -2.00795 | 18.99342 | 0.10568 | 14.9                  | 15.9 | 17.3 | 19.0 | 21.4 | 25.0 | 31.4 |
| 8 : 11     | 107   | -2.01231 | 19.05389 | 0.10619 | 14.9                  | 16.0 | 17.3 | 19.1 | 21.5 | 25.1 | 31.7 |
| 9 : 0      | 108   | -2.01558 | 19.11495 | 0.10671 | 14.9                  | 16.0 | 17.4 | 19.1 | 21.6 | 25.3 | 32.0 |
| 9 : 1      | 109   | -2.01780 | 19.17665 | 0.10722 | 15.0                  | 16.0 | 17.4 | 19.2 | 21.6 | 25.4 | 32.2 |
| 9 : 2      | 110   | -2.01897 | 19.23906 | 0.10774 | 15.0                  | 16.1 | 17.5 | 19.2 | 21.7 | 25.5 | 32.5 |
| 9 : 3      | 111   | -2.01912 | 19.30221 | 0.10825 | 15.0                  | 16.1 | 17.5 | 19.3 | 21.8 | 25.7 | 32.7 |
| 9 : 4      | 112   | -2.01828 | 19.36613 | 0.10877 | 15.1                  | 16.2 | 17.6 | 19.4 | 21.9 | 25.8 | 33.0 |
| 9 : 5      | 113   | -2.01647 | 19.43088 | 0.10928 | 15.1                  | 16.2 | 17.6 | 19.4 | 22.0 | 25.9 | 33.2 |
| 9 : 6      | 114   | -2.01371 | 19.49646 | 0.10979 | 15.1                  | 16.3 | 17.7 | 19.5 | 22.1 | 26.1 | 33.5 |
| 9 : 7      | 115   | -2.01004 | 19.56293 | 0.11029 | 15.2                  | 16.3 | 17.7 | 19.6 | 22.2 | 26.2 | 33.7 |
| 9 : 8      | 116   | -2.00546 | 19.63031 | 0.11080 | 15.2                  | 16.3 | 17.8 | 19.6 | 22.3 | 26.3 | 33.9 |
| 9 : 9      | 117   | -2.00000 | 19.69863 | 0.11130 | 15.3                  | 16.4 | 17.8 | 19.7 | 22.3 | 26.4 | 34.2 |

| Year:Month | Month | Z Scores (MUAC in cm) |          |         |      |      |      |      |      |      |      |
|------------|-------|-----------------------|----------|---------|------|------|------|------|------|------|------|
|            |       | L                     | M        | S       | -3   | -2   | -1   | 0    | +1   | +2   | +3   |
| 9 : 10     | 118   | -1.99370              | 19.76794 | 0.11179 | 15.3 | 16.4 | 17.9 | 19.8 | 22.4 | 26.6 | 34.4 |
| 9 : 11     | 119   | -1.98657              | 19.83825 | 0.11228 | 15.3 | 16.5 | 17.9 | 19.8 | 22.5 | 26.7 | 34.6 |
| 10 : 0     | 120   | -1.97863              | 19.90962 | 0.11277 | 15.4 | 16.5 | 18.0 | 19.9 | 22.6 | 26.8 | 34.8 |
| 10 : 1     | 121   | -1.96991              | 19.98207 | 0.11325 | 15.4 | 16.6 | 18.0 | 20.0 | 22.7 | 27.0 | 35.0 |
| 10 : 2     | 122   | -1.96043              | 20.05563 | 0.11372 | 15.4 | 16.6 | 18.1 | 20.1 | 22.8 | 27.1 | 35.2 |
| 10 : 3     | 123   | -1.95022              | 20.13034 | 0.11419 | 15.5 | 16.7 | 18.2 | 20.1 | 22.9 | 27.2 | 35.4 |
| 10 : 4     | 124   | -1.93930              | 20.20623 | 0.11465 | 15.5 | 16.7 | 18.2 | 20.2 | 23.0 | 27.4 | 35.6 |
| 10 : 5     | 125   | -1.92770              | 20.28334 | 0.11510 | 15.6 | 16.8 | 18.3 | 20.3 | 23.1 | 27.5 | 35.8 |
| 10 : 6     | 126   | -1.91544              | 20.36166 | 0.11554 | 15.6 | 16.8 | 18.3 | 20.4 | 23.2 | 27.6 | 36.0 |
| 10 : 7     | 127   | -1.90255              | 20.44122 | 0.11597 | 15.7 | 16.9 | 18.4 | 20.4 | 23.3 | 27.8 | 36.1 |
| 10 : 8     | 128   | -1.88906              | 20.52201 | 0.11640 | 15.7 | 16.9 | 18.5 | 20.5 | 23.4 | 27.9 | 36.3 |
| 10 : 9     | 129   | -1.87501              | 20.60406 | 0.11681 | 15.7 | 17.0 | 18.5 | 20.6 | 23.5 | 28.0 | 36.5 |
| 10 : 10    | 130   | -1.86041              | 20.68738 | 0.11721 | 15.8 | 17.0 | 18.6 | 20.7 | 23.6 | 28.1 | 36.6 |
| 10 : 11    | 131   | -1.84530              | 20.77196 | 0.11761 | 15.8 | 17.1 | 18.7 | 20.8 | 23.7 | 28.3 | 36.7 |
| 11 : 0     | 132   | -1.82971              | 20.85783 | 0.11798 | 15.9 | 17.1 | 18.7 | 20.9 | 23.8 | 28.4 | 36.9 |
| 11 : 1     | 133   | -1.81367              | 20.94498 | 0.11835 | 15.9 | 17.2 | 18.8 | 20.9 | 23.9 | 28.5 | 37.0 |
| 11 : 2     | 134   | -1.79720              | 21.03344 | 0.11870 | 16.0 | 17.3 | 18.9 | 21.0 | 24.0 | 28.7 | 37.1 |
| 11 : 3     | 135   | -1.78034              | 21.12321 | 0.11904 | 16.0 | 17.3 | 19.0 | 21.1 | 24.1 | 28.8 | 37.2 |
| 11 : 4     | 136   | -1.76312              | 21.21431 | 0.11937 | 16.1 | 17.4 | 19.0 | 21.2 | 24.3 | 28.9 | 37.4 |
| 11 : 5     | 137   | -1.74555              | 21.30673 | 0.11967 | 16.1 | 17.4 | 19.1 | 21.3 | 24.4 | 29.0 | 37.5 |
| 11 : 6     | 138   | -1.72768              | 21.40050 | 0.11997 | 16.2 | 17.5 | 19.2 | 21.4 | 24.5 | 29.2 | 37.6 |
| 11 : 7     | 139   | -1.70954              | 21.49562 | 0.12024 | 16.2 | 17.6 | 19.3 | 21.5 | 24.6 | 29.3 | 37.7 |
| 11 : 8     | 140   | -1.69114              | 21.59208 | 0.12050 | 16.3 | 17.6 | 19.3 | 21.6 | 24.7 | 29.4 | 37.8 |
| 11 : 9     | 141   | -1.67254              | 21.68983 | 0.12075 | 16.3 | 17.7 | 19.4 | 21.7 | 24.8 | 29.6 | 37.8 |
| 11 : 10    | 142   | -1.65377              | 21.78883 | 0.12097 | 16.4 | 17.8 | 19.5 | 21.8 | 24.9 | 29.7 | 37.9 |
| 11 : 11    | 143   | -1.63486              | 21.88905 | 0.12118 | 16.5 | 17.8 | 19.6 | 21.9 | 25.1 | 29.8 | 38.0 |
| 12 : 0     | 144   | -1.61586              | 21.99043 | 0.12137 | 16.5 | 17.9 | 19.7 | 22.0 | 25.2 | 29.9 | 38.1 |
| 12 : 1     | 145   | -1.59680              | 22.09294 | 0.12154 | 16.6 | 18.0 | 19.8 | 22.1 | 25.3 | 30.1 | 38.2 |
| 12 : 2     | 146   | -1.57771              | 22.19654 | 0.12169 | 16.6 | 18.1 | 19.9 | 22.2 | 25.4 | 30.2 | 38.2 |
| 12 : 3     | 147   | -1.55864              | 22.30118 | 0.12183 | 16.7 | 18.1 | 19.9 | 22.3 | 25.5 | 30.3 | 38.3 |
| 12 : 4     | 148   | -1.53962              | 22.40682 | 0.12194 | 16.8 | 18.2 | 20.0 | 22.4 | 25.6 | 30.4 | 38.4 |
| 12 : 5     | 149   | -1.52070              | 22.51341 | 0.12204 | 16.8 | 18.3 | 20.1 | 22.5 | 25.8 | 30.5 | 38.4 |
| 12 : 6     | 150   | -1.50190              | 22.62092 | 0.12212 | 16.9 | 18.4 | 20.2 | 22.6 | 25.9 | 30.7 | 38.5 |
| 12 : 7     | 151   | -1.48326              | 22.72931 | 0.12218 | 17.0 | 18.5 | 20.3 | 22.7 | 26.0 | 30.8 | 38.6 |
| 12 : 8     | 152   | -1.46482              | 22.83852 | 0.12221 | 17.0 | 18.5 | 20.4 | 22.8 | 26.1 | 30.9 | 38.6 |
| 12 : 9     | 153   | -1.44663              | 22.94852 | 0.12223 | 17.1 | 18.6 | 20.5 | 22.9 | 26.3 | 31.0 | 38.7 |
| 12 : 10    | 154   | -1.42870              | 23.05927 | 0.12223 | 17.2 | 18.7 | 20.6 | 23.1 | 26.4 | 31.1 | 38.8 |
| 12 : 11    | 155   | -1.41108              | 23.17069 | 0.12221 | 17.2 | 18.8 | 20.7 | 23.2 | 26.5 | 31.3 | 38.8 |
| 13 : 0     | 156   | -1.39378              | 23.28271 | 0.12217 | 17.3 | 18.9 | 20.8 | 23.3 | 26.6 | 31.4 | 38.9 |
| 13 : 1     | 157   | -1.37683              | 23.39523 | 0.12211 | 17.4 | 19.0 | 20.9 | 23.4 | 26.7 | 31.5 | 39.0 |
| 13 : 2     | 158   | -1.36024              | 23.50818 | 0.12204 | 17.5 | 19.0 | 21.0 | 23.5 | 26.9 | 31.6 | 39.0 |
| 13 : 3     | 159   | -1.34404              | 23.62148 | 0.12194 | 17.5 | 19.1 | 21.1 | 23.6 | 27.0 | 31.7 | 39.1 |
| 13 : 4     | 160   | -1.32825              | 23.73504 | 0.12183 | 17.6 | 19.2 | 21.2 | 23.7 | 27.1 | 31.9 | 39.1 |
| 13 : 5     | 161   | -1.31289              | 23.84879 | 0.12170 | 17.7 | 19.3 | 21.3 | 23.8 | 27.2 | 32.0 | 39.2 |
| 13 : 6     | 162   | -1.29798              | 23.96263 | 0.12155 | 17.8 | 19.4 | 21.4 | 24.0 | 27.4 | 32.1 | 39.3 |
| 13 : 7     | 163   | -1.28355              | 24.07649 | 0.12138 | 17.9 | 19.5 | 21.5 | 24.1 | 27.5 | 32.2 | 39.3 |
| 13 : 8     | 164   | -1.26961              | 24.19029 | 0.12120 | 17.9 | 19.6 | 21.6 | 24.2 | 27.6 | 32.3 | 39.4 |
| 13 : 9     | 165   | -1.25619              | 24.30394 | 0.12101 | 18.0 | 19.7 | 21.7 | 24.3 | 27.7 | 32.4 | 39.5 |
| 13 : 10    | 166   | -1.24331              | 24.41736 | 0.12079 | 18.1 | 19.8 | 21.8 | 24.4 | 27.8 | 32.5 | 39.5 |
| 13 : 11    | 167   | -1.23099              | 24.53048 | 0.12057 | 18.2 | 19.9 | 21.9 | 24.5 | 28.0 | 32.7 | 39.6 |
| 14 : 0     | 168   | -1.21926              | 24.64320 | 0.12032 | 18.3 | 20.0 | 22.0 | 24.6 | 28.1 | 32.8 | 39.7 |
| 14 : 1     | 169   | -1.20812              | 24.75546 | 0.12007 | 18.4 | 20.0 | 22.1 | 24.8 | 28.2 | 32.9 | 39.7 |
| 14 : 2     | 170   | -1.19761              | 24.86720 | 0.11980 | 18.4 | 20.1 | 22.2 | 24.9 | 28.3 | 33.0 | 39.8 |
| 14 : 3     | 171   | -1.18774              | 24.97838 | 0.11952 | 18.5 | 20.2 | 22.3 | 25.0 | 28.4 | 33.1 | 39.9 |
| 14 : 4     | 172   | -1.17852              | 25.08897 | 0.11922 | 18.6 | 20.3 | 22.4 | 25.1 | 28.5 | 33.2 | 39.9 |
| 14 : 5     | 173   | -1.16998              | 25.19891 | 0.11892 | 18.7 | 20.4 | 22.5 | 25.2 | 28.6 | 33.3 | 40.0 |
| 14 : 6     | 174   | -1.16213              | 25.30817 | 0.11860 | 18.8 | 20.5 | 22.6 | 25.3 | 28.8 | 33.4 | 40.1 |
| 14 : 7     | 175   | -1.15499              | 25.41670 | 0.11828 | 18.9 | 20.6 | 22.7 | 25.4 | 28.9 | 33.5 | 40.1 |
| 14 : 8     | 176   | -1.14858              | 25.52447 | 0.11795 | 19.0 | 20.7 | 22.9 | 25.5 | 29.0 | 33.6 | 40.2 |

| Year:Month | Month | Z Scores (MUAC in cm) |          |         |      |      |      |      |      |      |      |
|------------|-------|-----------------------|----------|---------|------|------|------|------|------|------|------|
|            |       | L                     | M        | S       | -3   | -2   | -1   | 0    | +1   | +2   | +3   |
| 14 : 9     | 177   | -1.14291              | 25.63143 | 0.11761 | 19.1 | 20.8 | 23.0 | 25.6 | 29.1 | 33.7 | 40.3 |
| 14 : 10    | 178   | -1.13800              | 25.73753 | 0.11726 | 19.1 | 20.9 | 23.1 | 25.7 | 29.2 | 33.8 | 40.3 |
| 14 : 11    | 179   | -1.13388              | 25.84274 | 0.11691 | 19.2 | 21.0 | 23.2 | 25.8 | 29.3 | 33.9 | 40.4 |
| 15 : 0     | 180   | -1.13055              | 25.94701 | 0.11655 | 19.3 | 21.1 | 23.3 | 25.9 | 29.4 | 34.0 | 40.5 |
| 15 : 1     | 181   | -1.12804              | 26.05030 | 0.11619 | 19.4 | 21.2 | 23.4 | 26.1 | 29.5 | 34.1 | 40.6 |
| 15 : 2     | 182   | -1.12636              | 26.15257 | 0.11583 | 19.5 | 21.3 | 23.5 | 26.2 | 29.6 | 34.2 | 40.6 |
| 15 : 3     | 183   | -1.12553              | 26.25377 | 0.11546 | 19.6 | 21.4 | 23.6 | 26.3 | 29.7 | 34.3 | 40.7 |
| 15 : 4     | 184   | -1.12555              | 26.35388 | 0.11510 | 19.7 | 21.5 | 23.7 | 26.4 | 29.8 | 34.4 | 40.8 |
| 15 : 5     | 185   | -1.12638              | 26.45289 | 0.11473 | 19.8 | 21.6 | 23.7 | 26.5 | 29.9 | 34.5 | 40.9 |
| 15 : 6     | 186   | -1.12800              | 26.55079 | 0.11436 | 19.9 | 21.7 | 23.8 | 26.6 | 30.0 | 34.6 | 41.0 |
| 15 : 7     | 187   | -1.13037              | 26.64757 | 0.11399 | 20.0 | 21.8 | 23.9 | 26.6 | 30.1 | 34.7 | 41.1 |
| 15 : 8     | 188   | -1.13345              | 26.74322 | 0.11362 | 20.0 | 21.8 | 24.0 | 26.7 | 30.2 | 34.8 | 41.1 |
| 15 : 9     | 189   | -1.13722              | 26.83773 | 0.11326 | 20.1 | 21.9 | 24.1 | 26.8 | 30.3 | 34.9 | 41.2 |
| 15 : 10    | 190   | -1.14163              | 26.93110 | 0.11290 | 20.2 | 22.0 | 24.2 | 26.9 | 30.4 | 35.0 | 41.3 |
| 15 : 11    | 191   | -1.14666              | 27.02332 | 0.11254 | 20.3 | 22.1 | 24.3 | 27.0 | 30.5 | 35.1 | 41.4 |
| 16 : 0     | 192   | -1.15227              | 27.11438 | 0.11219 | 20.4 | 22.2 | 24.4 | 27.1 | 30.6 | 35.2 | 41.5 |
| 16 : 1     | 193   | -1.15843              | 27.20427 | 0.11184 | 20.5 | 22.3 | 24.5 | 27.2 | 30.7 | 35.2 | 41.6 |
| 16 : 2     | 194   | -1.16511              | 27.29299 | 0.11150 | 20.6 | 22.4 | 24.6 | 27.3 | 30.8 | 35.3 | 41.7 |
| 16 : 3     | 195   | -1.17226              | 27.38052 | 0.11116 | 20.7 | 22.5 | 24.7 | 27.4 | 30.8 | 35.4 | 41.8 |
| 16 : 4     | 196   | -1.17986              | 27.46686 | 0.11083 | 20.7 | 22.6 | 24.7 | 27.5 | 30.9 | 35.5 | 41.9 |
| 16 : 5     | 197   | -1.18788              | 27.55200 | 0.11051 | 20.8 | 22.6 | 24.8 | 27.6 | 31.0 | 35.6 | 42.0 |
| 16 : 6     | 198   | -1.19627              | 27.63593 | 0.11020 | 20.9 | 22.7 | 24.9 | 27.6 | 31.1 | 35.7 | 42.1 |
| 16 : 7     | 199   | -1.20499              | 27.71865 | 0.10990 | 21.0 | 22.8 | 25.0 | 27.7 | 31.2 | 35.8 | 42.2 |
| 16 : 8     | 200   | -1.21395              | 27.80016 | 0.10960 | 21.1 | 22.9 | 25.1 | 27.8 | 31.3 | 35.9 | 42.3 |
| 16 : 9     | 201   | -1.22310              | 27.88048 | 0.10932 | 21.2 | 23.0 | 25.2 | 27.9 | 31.4 | 36.0 | 42.4 |
| 16 : 10    | 202   | -1.23235              | 27.95959 | 0.10904 | 21.2 | 23.0 | 25.2 | 28.0 | 31.4 | 36.0 | 42.5 |
| 16 : 11    | 203   | -1.24164              | 28.03751 | 0.10878 | 21.3 | 23.1 | 25.3 | 28.0 | 31.5 | 36.1 | 42.6 |
| 17 : 0     | 204   | -1.25090              | 28.11425 | 0.10852 | 21.4 | 23.2 | 25.4 | 28.1 | 31.6 | 36.2 | 42.7 |
| 17 : 1     | 205   | -1.26004              | 28.18980 | 0.10827 | 21.5 | 23.3 | 25.5 | 28.2 | 31.7 | 36.3 | 42.8 |
| 17 : 2     | 206   | -1.26901              | 28.26416 | 0.10803 | 21.5 | 23.4 | 25.5 | 28.3 | 31.7 | 36.4 | 42.9 |
| 17 : 3     | 207   | -1.27772              | 28.33735 | 0.10780 | 21.6 | 23.4 | 25.6 | 28.3 | 31.8 | 36.5 | 43.0 |
| 17 : 4     | 208   | -1.28612              | 28.40937 | 0.10758 | 21.7 | 23.5 | 25.7 | 28.4 | 31.9 | 36.5 | 43.1 |
| 17 : 5     | 209   | -1.29412              | 28.48021 | 0.10737 | 21.8 | 23.6 | 25.8 | 28.5 | 32.0 | 36.6 | 43.2 |
| 17 : 6     | 210   | -1.30165              | 28.54989 | 0.10716 | 21.8 | 23.6 | 25.8 | 28.5 | 32.0 | 36.7 | 43.3 |
| 17 : 7     | 211   | -1.30865              | 28.61841 | 0.10697 | 21.9 | 23.7 | 25.9 | 28.6 | 32.1 | 36.8 | 43.4 |
| 17 : 8     | 212   | -1.31504              | 28.68577 | 0.10679 | 22.0 | 23.8 | 26.0 | 28.7 | 32.2 | 36.9 | 43.5 |
| 17 : 9     | 213   | -1.32075              | 28.75198 | 0.10661 | 22.0 | 23.8 | 26.0 | 28.8 | 32.3 | 36.9 | 43.6 |
| 17 : 10    | 214   | -1.32576              | 28.81703 | 0.10645 | 22.1 | 23.9 | 26.1 | 28.8 | 32.3 | 37.0 | 43.7 |
| 17 : 11    | 215   | -1.33005              | 28.88093 | 0.10629 | 22.1 | 24.0 | 26.1 | 28.9 | 32.4 | 37.1 | 43.7 |
| 18 : 0     | 216   | -1.33359              | 28.94368 | 0.10614 | 22.2 | 24.0 | 26.2 | 28.9 | 32.5 | 37.1 | 43.8 |
| 18 : 1     | 217   | -1.33637              | 29.00529 | 0.10600 | 22.3 | 24.1 | 26.3 | 29.0 | 32.5 | 37.2 | 43.9 |
| 18 : 2     | 218   | -1.33836              | 29.06574 | 0.10587 | 22.3 | 24.1 | 26.3 | 29.1 | 32.6 | 37.3 | 44.0 |
| 18 : 3     | 219   | -1.33955              | 29.12505 | 0.10575 | 22.4 | 24.2 | 26.4 | 29.1 | 32.6 | 37.3 | 44.0 |
| 18 : 4     | 220   | -1.33992              | 29.18321 | 0.10563 | 22.4 | 24.2 | 26.4 | 29.2 | 32.7 | 37.4 | 44.1 |
| 18 : 5     | 221   | -1.33944              | 29.24023 | 0.10552 | 22.5 | 24.3 | 26.5 | 29.2 | 32.8 | 37.5 | 44.1 |
| 18 : 6     | 222   | -1.33810              | 29.29611 | 0.10542 | 22.5 | 24.3 | 26.5 | 29.3 | 32.8 | 37.5 | 44.2 |
| 18 : 7     | 223   | -1.33587              | 29.35084 | 0.10533 | 22.5 | 24.4 | 26.6 | 29.4 | 32.9 | 37.6 | 44.2 |
| 18 : 8     | 224   | -1.33274              | 29.40443 | 0.10524 | 22.6 | 24.4 | 26.6 | 29.4 | 32.9 | 37.6 | 44.3 |
| 18 : 9     | 225   | -1.32869              | 29.45689 | 0.10516 | 22.6 | 24.5 | 26.7 | 29.5 | 33.0 | 37.7 | 44.3 |
| 18 : 10    | 226   | -1.32369              | 29.50820 | 0.10508 | 22.7 | 24.5 | 26.7 | 29.5 | 33.0 | 37.7 | 44.4 |
| 18 : 11    | 227   | -1.31773              | 29.55838 | 0.10501 | 22.7 | 24.6 | 26.8 | 29.6 | 33.1 | 37.8 | 44.4 |
| 19 : 0     | 228   | -1.31080              | 29.60742 | 0.10495 | 22.7 | 24.6 | 26.8 | 29.6 | 33.1 | 37.8 | 44.4 |

## Mid-upper arm circumference-for-age GIRLS (5 to 19 years)

| 5 to 19 years |        |          | Z Scores (MUAC in cm) |         |      |      |      |      |      |      |      |  |
|---------------|--------|----------|-----------------------|---------|------|------|------|------|------|------|------|--|
| Year:Month    | Months | L        | M                     | S       | -3   | -2   | -1   | 0    | +1   | +2   | +3   |  |
| 5 : 0         | 60     | -0.49271 | 16.81684              | 0.09338 | 12.9 | 14.1 | 15.3 | 16.8 | 18.5 | 20.5 | 22.7 |  |
| 5 : 1         | 61     | -0.50464 | 16.86234              | 0.09380 | 13.0 | 14.1 | 15.4 | 16.9 | 18.6 | 20.5 | 22.8 |  |
| 5 : 2         | 62     | -0.51656 | 16.90778              | 0.09423 | 13.0 | 14.1 | 15.4 | 16.9 | 18.6 | 20.6 | 23.0 |  |
| 5 : 3         | 63     | -0.52844 | 16.95319              | 0.09467 | 13.0 | 14.2 | 15.5 | 17.0 | 18.7 | 20.7 | 23.1 |  |
| 5 : 4         | 64     | -0.54030 | 16.99859              | 0.09512 | 13.0 | 14.2 | 15.5 | 17.0 | 18.7 | 20.8 | 23.2 |  |
| 5 : 5         | 65     | -0.55212 | 17.04400              | 0.09557 | 13.1 | 14.2 | 15.5 | 17.0 | 18.8 | 20.9 | 23.3 |  |
| 5 : 6         | 66     | -0.56392 | 17.08945              | 0.09603 | 13.1 | 14.2 | 15.6 | 17.1 | 18.9 | 20.9 | 23.4 |  |
| 5 : 7         | 67     | -0.57568 | 17.13499              | 0.09649 | 13.1 | 14.3 | 15.6 | 17.1 | 18.9 | 21.0 | 23.5 |  |
| 5 : 8         | 68     | -0.58740 | 17.18065              | 0.09696 | 13.1 | 14.3 | 15.6 | 17.2 | 19.0 | 21.1 | 23.6 |  |
| 5 : 9         | 69     | -0.59908 | 17.22647              | 0.09744 | 13.2 | 14.3 | 15.7 | 17.2 | 19.0 | 21.2 | 23.8 |  |
| 5 : 10        | 70     | -0.61073 | 17.27250              | 0.09793 | 13.2 | 14.4 | 15.7 | 17.3 | 19.1 | 21.3 | 23.9 |  |
| 5 : 11        | 71     | -0.62233 | 17.31876              | 0.09842 | 13.2 | 14.4 | 15.7 | 17.3 | 19.2 | 21.4 | 24.0 |  |
| 6 : 0         | 72     | -0.63388 | 17.36531              | 0.09892 | 13.2 | 14.4 | 15.8 | 17.4 | 19.2 | 21.5 | 24.1 |  |
| 6 : 1         | 73     | -0.64539 | 17.41218              | 0.09943 | 13.3 | 14.4 | 15.8 | 17.4 | 19.3 | 21.5 | 24.3 |  |
| 6 : 2         | 74     | -0.65684 | 17.45942              | 0.09995 | 13.3 | 14.5 | 15.8 | 17.5 | 19.4 | 21.6 | 24.4 |  |
| 6 : 3         | 75     | -0.66825 | 17.50705              | 0.10047 | 13.3 | 14.5 | 15.9 | 17.5 | 19.4 | 21.7 | 24.5 |  |
| 6 : 4         | 76     | -0.67959 | 17.55514              | 0.10100 | 13.3 | 14.5 | 15.9 | 17.6 | 19.5 | 21.8 | 24.6 |  |
| 6 : 5         | 77     | -0.69089 | 17.60370              | 0.10154 | 13.4 | 14.6 | 16.0 | 17.6 | 19.6 | 21.9 | 24.8 |  |
| 6 : 6         | 78     | -0.70212 | 17.65279              | 0.10208 | 13.4 | 14.6 | 16.0 | 17.7 | 19.6 | 22.0 | 24.9 |  |
| 6 : 7         | 79     | -0.71329 | 17.70244              | 0.10263 | 13.4 | 14.6 | 16.0 | 17.7 | 19.7 | 22.1 | 25.1 |  |
| 6 : 8         | 80     | -0.72439 | 17.75270              | 0.10319 | 13.4 | 14.6 | 16.1 | 17.8 | 19.8 | 22.2 | 25.2 |  |
| 6 : 9         | 81     | -0.73543 | 17.80359              | 0.10375 | 13.5 | 14.7 | 16.1 | 17.8 | 19.8 | 22.3 | 25.4 |  |
| 6 : 10        | 82     | -0.74641 | 17.85514              | 0.10433 | 13.5 | 14.7 | 16.1 | 17.9 | 19.9 | 22.4 | 25.5 |  |
| 6 : 11        | 83     | -0.75731 | 17.90734              | 0.10490 | 13.5 | 14.7 | 16.2 | 17.9 | 20.0 | 22.5 | 25.7 |  |
| 7 : 0         | 84     | -0.76814 | 17.96022              | 0.10549 | 13.5 | 14.8 | 16.2 | 18.0 | 20.0 | 22.6 | 25.8 |  |
| 7 : 1         | 85     | -0.77891 | 18.01378              | 0.10608 | 13.6 | 14.8 | 16.3 | 18.0 | 20.1 | 22.7 | 26.0 |  |
| 7 : 2         | 86     | -0.78960 | 18.06804              | 0.10667 | 13.6 | 14.8 | 16.3 | 18.1 | 20.2 | 22.8 | 26.1 |  |
| 7 : 3         | 87     | -0.80022 | 18.12300              | 0.10727 | 13.6 | 14.9 | 16.4 | 18.1 | 20.3 | 22.9 | 26.3 |  |
| 7 : 4         | 88     | -0.81076 | 18.17868              | 0.10788 | 13.6 | 14.9 | 16.4 | 18.2 | 20.4 | 23.0 | 26.5 |  |
| 7 : 5         | 89     | -0.82123 | 18.23510              | 0.10848 | 13.7 | 14.9 | 16.4 | 18.2 | 20.4 | 23.2 | 26.6 |  |
| 7 : 6         | 90     | -0.83162 | 18.29225              | 0.10909 | 13.7 | 15.0 | 16.5 | 18.3 | 20.5 | 23.3 | 26.8 |  |
| 7 : 7         | 91     | -0.84193 | 18.35016              | 0.10971 | 13.7 | 15.0 | 16.5 | 18.4 | 20.6 | 23.4 | 27.0 |  |
| 7 : 8         | 92     | -0.85217 | 18.40883              | 0.11033 | 13.8 | 15.0 | 16.6 | 18.4 | 20.7 | 23.5 | 27.2 |  |
| 7 : 9         | 93     | -0.86233 | 18.46827              | 0.11094 | 13.8 | 15.1 | 16.6 | 18.5 | 20.8 | 23.6 | 27.3 |  |
| 7 : 10        | 94     | -0.87240 | 18.52850              | 0.11157 | 13.8 | 15.1 | 16.7 | 18.5 | 20.8 | 23.7 | 27.5 |  |
| 7 : 11        | 95     | -0.88239 | 18.58953              | 0.11219 | 13.8 | 15.1 | 16.7 | 18.6 | 20.9 | 23.9 | 27.7 |  |
| 8 : 0         | 96     | -0.89230 | 18.65136              | 0.11281 | 13.9 | 15.2 | 16.8 | 18.7 | 21.0 | 24.0 | 27.9 |  |
| 8 : 1         | 97     | -0.90213 | 18.71396              | 0.11343 | 13.9 | 15.2 | 16.8 | 18.7 | 21.1 | 24.1 | 28.1 |  |
| 8 : 2         | 98     | -0.91187 | 18.77734              | 0.11405 | 13.9 | 15.3 | 16.8 | 18.8 | 21.2 | 24.2 | 28.3 |  |
| 8 : 3         | 99     | -0.92153 | 18.84147              | 0.11467 | 14.0 | 15.3 | 16.9 | 18.8 | 21.3 | 24.4 | 28.5 |  |
| 8 : 4         | 100    | -0.93111 | 18.90633              | 0.11529 | 14.0 | 15.3 | 16.9 | 18.9 | 21.4 | 24.5 | 28.7 |  |
| 8 : 5         | 101    | -0.94061 | 18.97192              | 0.11590 | 14.0 | 15.4 | 17.0 | 19.0 | 21.4 | 24.6 | 28.9 |  |
| 8 : 6         | 102    | -0.95002 | 19.03822              | 0.11651 | 14.1 | 15.4 | 17.0 | 19.0 | 21.5 | 24.8 | 29.1 |  |
| 8 : 7         | 103    | -0.95935 | 19.10522              | 0.11712 | 14.1 | 15.5 | 17.1 | 19.1 | 21.6 | 24.9 | 29.3 |  |
| 8 : 8         | 104    | -0.96860 | 19.17289              | 0.11772 | 14.2 | 15.5 | 17.2 | 19.2 | 21.7 | 25.0 | 29.5 |  |
| 8 : 9         | 105    | -0.97776 | 19.24123              | 0.11831 | 14.2 | 15.6 | 17.2 | 19.2 | 21.8 | 25.2 | 29.8 |  |
| 8 : 10        | 106    | -0.98685 | 19.31023              | 0.11890 | 14.2 | 15.6 | 17.3 | 19.3 | 21.9 | 25.3 | 30.0 |  |
| 8 : 11        | 107    | -0.99585 | 19.37986              | 0.11948 | 14.3 | 15.6 | 17.3 | 19.4 | 22.0 | 25.5 | 30.2 |  |
| 9 : 0         | 108    | -1.00477 | 19.45011              | 0.12006 | 14.3 | 15.7 | 17.4 | 19.5 | 22.1 | 25.6 | 30.4 |  |
| 9 : 1         | 109    | -1.01360 | 19.52097              | 0.12062 | 14.3 | 15.7 | 17.4 | 19.5 | 22.2 | 25.7 | 30.6 |  |
| 9 : 2         | 110    | -1.02236 | 19.59243              | 0.12117 | 14.4 | 15.8 | 17.5 | 19.6 | 22.3 | 25.9 | 30.9 |  |
| 9 : 3         | 111    | -1.03103 | 19.66448              | 0.12171 | 14.4 | 15.8 | 17.5 | 19.7 | 22.4 | 26.0 | 31.1 |  |
| 9 : 4         | 112    | -1.03963 | 19.73712              | 0.12224 | 14.5 | 15.9 | 17.6 | 19.7 | 22.5 | 26.2 | 31.3 |  |
| 9 : 5         | 113    | -1.04814 | 19.81035              | 0.12276 | 14.5 | 15.9 | 17.6 | 19.8 | 22.6 | 26.3 | 31.6 |  |
| 9 : 6         | 114    | -1.05657 | 19.88418              | 0.12327 | 14.6 | 16.0 | 17.7 | 19.9 | 22.7 | 26.5 | 31.8 |  |
| 9 : 7         | 115    | -1.06493 | 19.95861              | 0.12376 | 14.6 | 16.0 | 17.8 | 20.0 | 22.8 | 26.6 | 32.0 |  |
| 9 : 8         | 116    | -1.07321 | 20.03364              | 0.12424 | 14.6 | 16.1 | 17.8 | 20.0 | 22.9 | 26.7 | 32.2 |  |
| 9 : 9         | 117    | -1.08141 | 20.10928              | 0.12471 | 14.7 | 16.1 | 17.9 | 20.1 | 23.0 | 26.9 | 32.5 |  |



| 5 to 19 years |        |          | Z Scores (MUAC in cm) |         |      |      |      |      |      |      |      |  |
|---------------|--------|----------|-----------------------|---------|------|------|------|------|------|------|------|--|
| Year:Month    | Months | L        | M                     | S       | -3   | -2   | -1   | 0    | +1   | +2   | +3   |  |
| 9 : 10        | 118    | -1.08954 | 20.18551              | 0.12515 | 14.7 | 16.2 | 18.0 | 20.2 | 23.1 | 27.0 | 32.7 |  |
| 9 : 11        | 119    | -1.09759 | 20.26235              | 0.12559 | 14.8 | 16.2 | 18.0 | 20.3 | 23.2 | 27.2 | 32.9 |  |
| 10 : 0        | 120    | -1.10557 | 20.33979              | 0.12601 | 14.8 | 16.3 | 18.1 | 20.3 | 23.3 | 27.3 | 33.2 |  |
| 10 : 1        | 121    | -1.11347 | 20.41785              | 0.12641 | 14.9 | 16.3 | 18.1 | 20.4 | 23.4 | 27.5 | 33.4 |  |
| 10 : 2        | 122    | -1.12131 | 20.49651              | 0.12679 | 14.9 | 16.4 | 18.2 | 20.5 | 23.5 | 27.6 | 33.7 |  |
| 10 : 3        | 123    | -1.12907 | 20.57578              | 0.12716 | 15.0 | 16.5 | 18.3 | 20.6 | 23.6 | 27.8 | 33.9 |  |
| 10 : 4        | 124    | -1.13676 | 20.65567              | 0.12751 | 15.0 | 16.5 | 18.3 | 20.7 | 23.7 | 27.9 | 34.1 |  |
| 10 : 5        | 125    | -1.14439 | 20.73616              | 0.12783 | 15.1 | 16.6 | 18.4 | 20.7 | 23.8 | 28.1 | 34.4 |  |
| 10 : 6        | 126    | -1.15194 | 20.81724              | 0.12814 | 15.1 | 16.6 | 18.5 | 20.8 | 23.9 | 28.2 | 34.6 |  |
| 10 : 7        | 127    | -1.15943 | 20.89887              | 0.12843 | 15.2 | 16.7 | 18.5 | 20.9 | 24.0 | 28.4 | 34.8 |  |
| 10 : 8        | 128    | -1.16685 | 20.98103              | 0.12870 | 15.3 | 16.8 | 18.6 | 21.0 | 24.1 | 28.5 | 35.1 |  |
| 10 : 9        | 129    | -1.17420 | 21.06370              | 0.12895 | 15.3 | 16.8 | 18.7 | 21.1 | 24.2 | 28.6 | 35.3 |  |
| 10 : 10       | 130    | -1.18149 | 21.14683              | 0.12918 | 15.4 | 16.9 | 18.8 | 21.1 | 24.3 | 28.8 | 35.5 |  |
| 10 : 11       | 131    | -1.18871 | 21.23041              | 0.12939 | 15.4 | 16.9 | 18.8 | 21.2 | 24.4 | 28.9 | 35.7 |  |
| 11 : 0        | 132    | -1.19587 | 21.31441              | 0.12958 | 15.5 | 17.0 | 18.9 | 21.3 | 24.5 | 29.1 | 36.0 |  |
| 11 : 1        | 133    | -1.20297 | 21.39880              | 0.12976 | 15.5 | 17.1 | 19.0 | 21.4 | 24.6 | 29.2 | 36.2 |  |
| 11 : 2        | 134    | -1.21000 | 21.48355              | 0.12991 | 15.6 | 17.1 | 19.0 | 21.5 | 24.7 | 29.3 | 36.4 |  |
| 11 : 3        | 135    | -1.21697 | 21.56863              | 0.13004 | 15.7 | 17.2 | 19.1 | 21.6 | 24.8 | 29.5 | 36.6 |  |
| 11 : 4        | 136    | -1.22389 | 21.65401              | 0.13016 | 15.7 | 17.3 | 19.2 | 21.7 | 25.0 | 29.6 | 36.8 |  |
| 11 : 5        | 137    | -1.23074 | 21.73968              | 0.13025 | 15.8 | 17.3 | 19.3 | 21.7 | 25.1 | 29.8 | 37.0 |  |
| 11 : 6        | 138    | -1.23753 | 21.82559              | 0.13032 | 15.9 | 17.4 | 19.3 | 21.8 | 25.2 | 29.9 | 37.2 |  |
| 11 : 7        | 139    | -1.24427 | 21.91173              | 0.13038 | 15.9 | 17.5 | 19.4 | 21.9 | 25.3 | 30.0 | 37.4 |  |
| 11 : 8        | 140    | -1.25095 | 21.99804              | 0.13041 | 16.0 | 17.6 | 19.5 | 22.0 | 25.4 | 30.2 | 37.6 |  |
| 11 : 9        | 141    | -1.25757 | 22.08447              | 0.13043 | 16.1 | 17.6 | 19.6 | 22.1 | 25.5 | 30.3 | 37.8 |  |
| 11 : 10       | 142    | -1.26414 | 22.17095              | 0.13043 | 16.1 | 17.7 | 19.6 | 22.2 | 25.6 | 30.4 | 38.0 |  |
| 11 : 11       | 143    | -1.27064 | 22.25742              | 0.13041 | 16.2 | 17.8 | 19.7 | 22.3 | 25.7 | 30.6 | 38.2 |  |
| 12 : 0        | 144    | -1.27709 | 22.34380              | 0.13037 | 16.3 | 17.8 | 19.8 | 22.3 | 25.8 | 30.7 | 38.4 |  |
| 12 : 1        | 145    | -1.28349 | 22.43004              | 0.13032 | 16.3 | 17.9 | 19.9 | 22.4 | 25.9 | 30.8 | 38.6 |  |
| 12 : 2        | 146    | -1.28983 | 22.51607              | 0.13025 | 16.4 | 18.0 | 20.0 | 22.5 | 26.0 | 30.9 | 38.8 |  |
| 12 : 3        | 147    | -1.29611 | 22.60182              | 0.13017 | 16.5 | 18.1 | 20.0 | 22.6 | 26.1 | 31.1 | 39.0 |  |
| 12 : 4        | 148    | -1.30233 | 22.68723              | 0.13008 | 16.5 | 18.1 | 20.1 | 22.7 | 26.2 | 31.2 | 39.1 |  |
| 12 : 5        | 149    | -1.30850 | 22.77224              | 0.12997 | 16.6 | 18.2 | 20.2 | 22.8 | 26.3 | 31.3 | 39.3 |  |
| 12 : 6        | 150    | -1.31461 | 22.85678              | 0.12985 | 16.7 | 18.3 | 20.3 | 22.9 | 26.4 | 31.4 | 39.5 |  |
| 12 : 7        | 151    | -1.32067 | 22.94077              | 0.12971 | 16.8 | 18.4 | 20.4 | 22.9 | 26.4 | 31.5 | 39.6 |  |
| 12 : 8        | 152    | -1.32667 | 23.02417              | 0.12957 | 16.8 | 18.4 | 20.4 | 23.0 | 26.5 | 31.6 | 39.8 |  |
| 12 : 9        | 153    | -1.33261 | 23.10690              | 0.12941 | 16.9 | 18.5 | 20.5 | 23.1 | 26.6 | 31.7 | 39.9 |  |
| 12 : 10       | 154    | -1.33850 | 23.18890              | 0.12925 | 17.0 | 18.6 | 20.6 | 23.2 | 26.7 | 31.8 | 40.1 |  |
| 12 : 11       | 155    | -1.34434 | 23.27013              | 0.12907 | 17.0 | 18.6 | 20.7 | 23.3 | 26.8 | 32.0 | 40.2 |  |
| 13 : 0        | 156    | -1.35012 | 23.35053              | 0.12889 | 17.1 | 18.7 | 20.7 | 23.4 | 26.9 | 32.1 | 40.3 |  |
| 13 : 1        | 157    | -1.35584 | 23.43008              | 0.12870 | 17.2 | 18.8 | 20.8 | 23.4 | 27.0 | 32.2 | 40.5 |  |
| 13 : 2        | 158    | -1.36150 | 23.50874              | 0.12850 | 17.2 | 18.9 | 20.9 | 23.5 | 27.1 | 32.3 | 40.6 |  |
| 13 : 3        | 159    | -1.36711 | 23.58647              | 0.12830 | 17.3 | 18.9 | 21.0 | 23.6 | 27.2 | 32.4 | 40.7 |  |
| 13 : 4        | 160    | -1.37265 | 23.66323              | 0.12809 | 17.4 | 19.0 | 21.0 | 23.7 | 27.2 | 32.4 | 40.9 |  |
| 13 : 5        | 161    | -1.37814 | 23.73898              | 0.12787 | 17.4 | 19.1 | 21.1 | 23.7 | 27.3 | 32.5 | 41.0 |  |
| 13 : 6        | 162    | -1.38357 | 23.81369              | 0.12766 | 17.5 | 19.1 | 21.2 | 23.8 | 27.4 | 32.6 | 41.1 |  |
| 13 : 7        | 163    | -1.38894 | 23.88732              | 0.12744 | 17.6 | 19.2 | 21.2 | 23.9 | 27.5 | 32.7 | 41.2 |  |
| 13 : 8        | 164    | -1.39425 | 23.95982              | 0.12721 | 17.6 | 19.3 | 21.3 | 24.0 | 27.6 | 32.8 | 41.3 |  |
| 13 : 9        | 165    | -1.39950 | 24.03118              | 0.12699 | 17.7 | 19.3 | 21.4 | 24.0 | 27.6 | 32.9 | 41.4 |  |
| 13 : 10       | 166    | -1.40469 | 24.10133              | 0.12676 | 17.8 | 19.4 | 21.4 | 24.1 | 27.7 | 33.0 | 41.5 |  |
| 13 : 11       | 167    | -1.40982 | 24.17025              | 0.12653 | 17.8 | 19.5 | 21.5 | 24.2 | 27.8 | 33.1 | 41.6 |  |
| 14 : 0        | 168    | -1.41489 | 24.23790              | 0.12630 | 17.9 | 19.5 | 21.6 | 24.2 | 27.9 | 33.1 | 41.7 |  |
| 14 : 1        | 169    | -1.41989 | 24.30425              | 0.12608 | 18.0 | 19.6 | 21.6 | 24.3 | 27.9 | 33.2 | 41.8 |  |
| 14 : 2        | 170    | -1.42484 | 24.36928              | 0.12585 | 18.0 | 19.7 | 21.7 | 24.4 | 28.0 | 33.3 | 41.9 |  |
| 14 : 3        | 171    | -1.42971 | 24.43300              | 0.12563 | 18.1 | 19.7 | 21.8 | 24.4 | 28.1 | 33.4 | 42.0 |  |
| 14 : 4        | 172    | -1.43453 | 24.49541              | 0.12541 | 18.1 | 19.8 | 21.8 | 24.5 | 28.1 | 33.4 | 42.1 |  |
| 14 : 5        | 173    | -1.43928 | 24.55649              | 0.12519 | 18.2 | 19.8 | 21.9 | 24.6 | 28.2 | 33.5 | 42.2 |  |
| 14 : 6        | 174    | -1.44397 | 24.61626              | 0.12498 | 18.2 | 19.9 | 21.9 | 24.6 | 28.3 | 33.6 | 42.2 |  |
| 14 : 7        | 175    | -1.44859 | 24.67470              | 0.12476 | 18.3 | 19.9 | 22.0 | 24.7 | 28.3 | 33.6 | 42.3 |  |
| 14 : 8        | 176    | -1.45315 | 24.73182              | 0.12456 | 18.3 | 20.0 | 22.1 | 24.7 | 28.4 | 33.7 | 42.4 |  |

| 5 to 19 years |        |          | Z Scores (MUAC in cm) |         |      |      |      |      |      |      |      |  |
|---------------|--------|----------|-----------------------|---------|------|------|------|------|------|------|------|--|
| Year:Month    | Months | L        | M                     | S       | -3   | -2   | -1   | 0    | +1   | +2   | +3   |  |
| 14 : 9        | 177    | -1.45764 | 24.78761              | 0.12436 | 18.4 | 20.0 | 22.1 | 24.8 | 28.4 | 33.8 | 42.5 |  |
| 14 : 10       | 178    | -1.46207 | 24.84208              | 0.12416 | 18.5 | 20.1 | 22.2 | 24.8 | 28.5 | 33.8 | 42.5 |  |
| 14 : 11       | 179    | -1.46642 | 24.89521              | 0.12397 | 18.5 | 20.1 | 22.2 | 24.9 | 28.5 | 33.9 | 42.6 |  |
| 15 : 0        | 180    | -1.47072 | 24.94702              | 0.12378 | 18.5 | 20.2 | 22.3 | 24.9 | 28.6 | 33.9 | 42.7 |  |
| 15 : 1        | 181    | -1.47494 | 24.99749              | 0.12360 | 18.6 | 20.2 | 22.3 | 25.0 | 28.7 | 34.0 | 42.8 |  |
| 15 : 2        | 182    | -1.47910 | 25.04663              | 0.12343 | 18.6 | 20.3 | 22.4 | 25.0 | 28.7 | 34.1 | 42.8 |  |
| 15 : 3        | 183    | -1.48319 | 25.09442              | 0.12326 | 18.7 | 20.3 | 22.4 | 25.1 | 28.8 | 34.1 | 42.9 |  |
| 15 : 4        | 184    | -1.48721 | 25.14089              | 0.12311 | 18.7 | 20.4 | 22.5 | 25.1 | 28.8 | 34.2 | 43.0 |  |
| 15 : 5        | 185    | -1.49116 | 25.18605              | 0.12296 | 18.8 | 20.4 | 22.5 | 25.2 | 28.9 | 34.2 | 43.0 |  |
| 15 : 6        | 186    | -1.49504 | 25.22993              | 0.12281 | 18.8 | 20.5 | 22.5 | 25.2 | 28.9 | 34.3 | 43.1 |  |
| 15 : 7        | 187    | -1.49886 | 25.27255              | 0.12268 | 18.9 | 20.5 | 22.6 | 25.3 | 28.9 | 34.3 | 43.2 |  |
| 15 : 8        | 188    | -1.50260 | 25.31393              | 0.12255 | 18.9 | 20.5 | 22.6 | 25.3 | 29.0 | 34.4 | 43.2 |  |
| 15 : 9        | 189    | -1.50628 | 25.35410              | 0.12243 | 18.9 | 20.6 | 22.7 | 25.4 | 29.0 | 34.4 | 43.3 |  |
| 15 : 10       | 190    | -1.50989 | 25.39309              | 0.12232 | 19.0 | 20.6 | 22.7 | 25.4 | 29.1 | 34.5 | 43.4 |  |
| 15 : 11       | 191    | -1.51343 | 25.43091              | 0.12222 | 19.0 | 20.7 | 22.7 | 25.4 | 29.1 | 34.5 | 43.4 |  |
| 16 : 0        | 192    | -1.51691 | 25.46760              | 0.12213 | 19.0 | 20.7 | 22.8 | 25.5 | 29.2 | 34.6 | 43.5 |  |
| 16 : 1        | 193    | -1.52031 | 25.50317              | 0.12204 | 19.1 | 20.7 | 22.8 | 25.5 | 29.2 | 34.6 | 43.5 |  |
| 16 : 2        | 194    | -1.52364 | 25.53766              | 0.12196 | 19.1 | 20.8 | 22.8 | 25.5 | 29.2 | 34.6 | 43.6 |  |
| 16 : 3        | 195    | -1.52691 | 25.57108              | 0.12189 | 19.1 | 20.8 | 22.9 | 25.6 | 29.3 | 34.7 | 43.7 |  |
| 16 : 4        | 196    | -1.53011 | 25.60346              | 0.12183 | 19.2 | 20.8 | 22.9 | 25.6 | 29.3 | 34.7 | 43.7 |  |
| 16 : 5        | 197    | -1.53324 | 25.63483              | 0.12177 | 19.2 | 20.8 | 22.9 | 25.6 | 29.3 | 34.8 | 43.8 |  |
| 16 : 6        | 198    | -1.53630 | 25.66520              | 0.12173 | 19.2 | 20.9 | 23.0 | 25.7 | 29.4 | 34.8 | 43.9 |  |
| 16 : 7        | 199    | -1.53930 | 25.69462              | 0.12169 | 19.2 | 20.9 | 23.0 | 25.7 | 29.4 | 34.9 | 43.9 |  |
| 16 : 8        | 200    | -1.54222 | 25.72310              | 0.12166 | 19.3 | 20.9 | 23.0 | 25.7 | 29.4 | 34.9 | 44.0 |  |
| 16 : 9        | 201    | -1.54508 | 25.75069              | 0.12164 | 19.3 | 20.9 | 23.0 | 25.8 | 29.5 | 34.9 | 44.1 |  |
| 16 : 10       | 202    | -1.54788 | 25.77741              | 0.12163 | 19.3 | 21.0 | 23.1 | 25.8 | 29.5 | 35.0 | 44.1 |  |
| 16 : 11       | 203    | -1.55061 | 25.80329              | 0.12162 | 19.3 | 21.0 | 23.1 | 25.8 | 29.5 | 35.0 | 44.2 |  |
| 17 : 0        | 204    | -1.55328 | 25.82837              | 0.12162 | 19.3 | 21.0 | 23.1 | 25.8 | 29.6 | 35.1 | 44.3 |  |
| 17 : 1        | 205    | -1.55588 | 25.85269              | 0.12163 | 19.4 | 21.0 | 23.1 | 25.9 | 29.6 | 35.1 | 44.3 |  |
| 17 : 2        | 206    | -1.55843 | 25.87626              | 0.12165 | 19.4 | 21.1 | 23.1 | 25.9 | 29.6 | 35.1 | 44.4 |  |
| 17 : 3        | 207    | -1.56091 | 25.89913              | 0.12167 | 19.4 | 21.1 | 23.2 | 25.9 | 29.6 | 35.2 | 44.5 |  |
| 17 : 4        | 208    | -1.56333 | 25.92133              | 0.12170 | 19.4 | 21.1 | 23.2 | 25.9 | 29.7 | 35.2 | 44.5 |  |
| 17 : 5        | 209    | -1.56569 | 25.94288              | 0.12174 | 19.4 | 21.1 | 23.2 | 25.9 | 29.7 | 35.3 | 44.6 |  |
| 17 : 6        | 210    | -1.56799 | 25.96382              | 0.12178 | 19.5 | 21.1 | 23.2 | 26.0 | 29.7 | 35.3 | 44.7 |  |
| 17 : 7        | 211    | -1.57024 | 25.98419              | 0.12183 | 19.5 | 21.1 | 23.2 | 26.0 | 29.7 | 35.3 | 44.7 |  |
| 17 : 8        | 212    | -1.57243 | 26.00401              | 0.12189 | 19.5 | 21.2 | 23.3 | 26.0 | 29.8 | 35.4 | 44.8 |  |
| 17 : 9        | 213    | -1.57456 | 26.02332              | 0.12195 | 19.5 | 21.2 | 23.3 | 26.0 | 29.8 | 35.4 | 44.9 |  |
| 17 : 10       | 214    | -1.57664 | 26.04213              | 0.12202 | 19.5 | 21.2 | 23.3 | 26.0 | 29.8 | 35.4 | 45.0 |  |
| 17 : 11       | 215    | -1.57867 | 26.06047              | 0.12210 | 19.5 | 21.2 | 23.3 | 26.1 | 29.8 | 35.5 | 45.0 |  |
| 18 : 0        | 216    | -1.58064 | 26.07835              | 0.12218 | 19.5 | 21.2 | 23.3 | 26.1 | 29.9 | 35.5 | 45.1 |  |
| 18 : 1        | 217    | -1.58256 | 26.09580              | 0.12227 | 19.5 | 21.2 | 23.3 | 26.1 | 29.9 | 35.6 | 45.2 |  |
| 18 : 2        | 218    | -1.58443 | 26.11283              | 0.12236 | 19.6 | 21.2 | 23.3 | 26.1 | 29.9 | 35.6 | 45.3 |  |
| 18 : 3        | 219    | -1.58625 | 26.12947              | 0.12246 | 19.6 | 21.2 | 23.4 | 26.1 | 29.9 | 35.6 | 45.3 |  |
| 18 : 4        | 220    | -1.58803 | 26.14572              | 0.12256 | 19.6 | 21.3 | 23.4 | 26.1 | 30.0 | 35.7 | 45.4 |  |
| 18 : 5        | 221    | -1.58975 | 26.16161              | 0.12267 | 19.6 | 21.3 | 23.4 | 26.2 | 30.0 | 35.7 | 45.5 |  |
| 18 : 6        | 222    | -1.59143 | 26.17717              | 0.12278 | 19.6 | 21.3 | 23.4 | 26.2 | 30.0 | 35.7 | 45.6 |  |
| 18 : 7        | 223    | -1.59307 | 26.19240              | 0.12290 | 19.6 | 21.3 | 23.4 | 26.2 | 30.0 | 35.8 | 45.7 |  |
| 18 : 8        | 224    | -1.59466 | 26.20732              | 0.12302 | 19.6 | 21.3 | 23.4 | 26.2 | 30.1 | 35.8 | 45.7 |  |
| 18 : 9        | 225    | -1.59621 | 26.22197              | 0.12315 | 19.6 | 21.3 | 23.4 | 26.2 | 30.1 | 35.9 | 45.8 |  |
| 18 : 10       | 226    | -1.59771 | 26.23634              | 0.12328 | 19.6 | 21.3 | 23.4 | 26.2 | 30.1 | 35.9 | 45.9 |  |
| 18 : 11       | 227    | -1.59918 | 26.25047              | 0.12342 | 19.6 | 21.3 | 23.5 | 26.3 | 30.1 | 35.9 | 46.0 |  |
| 19 : 0        | 228    | -1.60061 | 26.26437              | 0.12356 | 19.6 | 21.3 | 23.5 | 26.3 | 30.1 | 36.0 | 46.1 |  |

## Mid-upper arm circumference-for-age BOYS. (5 to 19 years)

| 5 to 19 years |        |          | Percentiles (MUAC in cm) |         |      |      |      |      |      |      |      |      |      |      |      |
|---------------|--------|----------|--------------------------|---------|------|------|------|------|------|------|------|------|------|------|------|
| Year : Month  | Months | L        | M                        | S       | 1st  | 3rd  | 5th  | 15th | 25th | 50th | 75th | 85th | 95th | 97th | 99th |
| 5 : 0         | 60     | -0.72895 | 16.5189                  | 0.08670 | 13.7 | 14.2 | 14.4 | 15.1 | 15.6 | 16.5 | 17.5 | 18.1 | 19.2 | 19.7 | 20.5 |
| 5 : 1         | 61     | -0.75845 | 16.5516                  | 0.08699 | 13.7 | 14.2 | 14.4 | 15.2 | 15.6 | 16.6 | 17.6 | 18.2 | 19.3 | 19.7 | 20.6 |
| 5 : 2         | 62     | -0.78927 | 16.5856                  | 0.08728 | 13.7 | 14.2 | 14.5 | 15.2 | 15.7 | 16.6 | 17.6 | 18.2 | 19.3 | 19.8 | 20.7 |
| 5 : 3         | 63     | -0.82138 | 16.6212                  | 0.08758 | 13.8 | 14.2 | 14.5 | 15.2 | 15.7 | 16.6 | 17.7 | 18.3 | 19.4 | 19.8 | 20.8 |
| 5 : 4         | 64     | -0.85473 | 16.6585                  | 0.08789 | 13.8 | 14.3 | 14.5 | 15.3 | 15.7 | 16.7 | 17.7 | 18.3 | 19.4 | 19.9 | 20.9 |
| 5 : 5         | 65     | -0.88928 | 16.6978                  | 0.08819 | 13.8 | 14.3 | 14.6 | 15.3 | 15.8 | 16.7 | 17.7 | 18.4 | 19.5 | 20.0 | 20.9 |
| 5 : 6         | 66     | -0.92496 | 16.7391                  | 0.08851 | 13.9 | 14.3 | 14.6 | 15.3 | 15.8 | 16.7 | 17.8 | 18.4 | 19.6 | 20.1 | 21.0 |
| 5 : 7         | 67     | -0.96164 | 16.7825                  | 0.08882 | 13.9 | 14.4 | 14.6 | 15.4 | 15.8 | 16.8 | 17.8 | 18.5 | 19.6 | 20.1 | 21.1 |
| 5 : 8         | 68     | -0.99919 | 16.8277                  | 0.08915 | 13.9 | 14.4 | 14.7 | 15.4 | 15.9 | 16.8 | 17.9 | 18.5 | 19.7 | 20.2 | 21.2 |
| 5 : 9         | 69     | -1.03745 | 16.8746                  | 0.08948 | 14.0 | 14.4 | 14.7 | 15.4 | 15.9 | 16.9 | 18.0 | 18.6 | 19.8 | 20.3 | 21.3 |
| 5 : 10        | 70     | -1.07629 | 16.9232                  | 0.08981 | 14.0 | 14.5 | 14.8 | 15.5 | 16.0 | 16.9 | 18.0 | 18.7 | 19.9 | 20.4 | 21.4 |
| 5 : 11        | 71     | -1.11556 | 16.9732                  | 0.09015 | 14.1 | 14.5 | 14.8 | 15.5 | 16.0 | 17.0 | 18.1 | 18.7 | 20.0 | 20.5 | 21.6 |
| 6 : 0         | 72     | -1.15511 | 17.0247                  | 0.09049 | 14.1 | 14.6 | 14.8 | 15.6 | 16.1 | 17.0 | 18.1 | 18.8 | 20.0 | 20.6 | 21.7 |
| 6 : 1         | 73     | -1.19480 | 17.0773                  | 0.09084 | 14.1 | 14.6 | 14.9 | 15.6 | 16.1 | 17.1 | 18.2 | 18.9 | 20.1 | 20.7 | 21.8 |
| 6 : 2         | 74     | -1.23449 | 17.1311                  | 0.09120 | 14.2 | 14.7 | 14.9 | 15.7 | 16.1 | 17.1 | 18.3 | 18.9 | 20.2 | 20.8 | 21.9 |
| 6 : 3         | 75     | -1.27403 | 17.1858                  | 0.09156 | 14.2 | 14.7 | 15.0 | 15.7 | 16.2 | 17.2 | 18.3 | 19.0 | 20.3 | 20.9 | 22.0 |
| 6 : 4         | 76     | -1.31328 | 17.2414                  | 0.09193 | 14.3 | 14.8 | 15.0 | 15.8 | 16.2 | 17.2 | 18.4 | 19.1 | 20.4 | 21.0 | 22.2 |
| 6 : 5         | 77     | -1.35210 | 17.2977                  | 0.09231 | 14.3 | 14.8 | 15.1 | 15.8 | 16.3 | 17.3 | 18.5 | 19.2 | 20.5 | 21.1 | 22.3 |
| 6 : 6         | 78     | -1.39034 | 17.3547                  | 0.09269 | 14.4 | 14.8 | 15.1 | 15.9 | 16.3 | 17.4 | 18.5 | 19.2 | 20.6 | 21.2 | 22.4 |
| 6 : 7         | 79     | -1.42785 | 17.4121                  | 0.09308 | 14.4 | 14.9 | 15.2 | 15.9 | 16.4 | 17.4 | 18.6 | 19.3 | 20.7 | 21.3 | 22.6 |
| 6 : 8         | 80     | -1.46450 | 17.4698                  | 0.09347 | 14.5 | 14.9 | 15.2 | 16.0 | 16.4 | 17.5 | 18.7 | 19.4 | 20.8 | 21.4 | 22.7 |
| 6 : 9         | 81     | -1.50018 | 17.5278                  | 0.09388 | 14.5 | 15.0 | 15.3 | 16.0 | 16.5 | 17.5 | 18.7 | 19.5 | 20.9 | 21.5 | 22.8 |
| 6 : 10        | 82     | -1.53485 | 17.5861                  | 0.09428 | 14.6 | 15.0 | 15.3 | 16.1 | 16.6 | 17.6 | 18.8 | 19.5 | 21.0 | 21.6 | 23.0 |
| 6 : 11        | 83     | -1.56850 | 17.6445                  | 0.09470 | 14.6 | 15.1 | 15.3 | 16.1 | 16.6 | 17.6 | 18.9 | 19.6 | 21.1 | 21.7 | 23.1 |
| 7 : 0         | 84     | -1.60108 | 17.7031                  | 0.09512 | 14.6 | 15.1 | 15.4 | 16.2 | 16.7 | 17.7 | 18.9 | 19.7 | 21.2 | 21.9 | 23.3 |
| 7 : 1         | 85     | -1.63258 | 17.7618                  | 0.09555 | 14.7 | 15.2 | 15.4 | 16.2 | 16.7 | 17.8 | 19.0 | 19.8 | 21.3 | 22.0 | 23.4 |
| 7 : 2         | 86     | -1.66297 | 17.8206                  | 0.09598 | 14.7 | 15.2 | 15.5 | 16.3 | 16.8 | 17.8 | 19.1 | 19.9 | 21.4 | 22.1 | 23.6 |
| 7 : 3         | 87     | -1.69222 | 17.8795                  | 0.09642 | 14.8 | 15.3 | 15.5 | 16.3 | 16.8 | 17.9 | 19.2 | 19.9 | 21.5 | 22.2 | 23.7 |
| 7 : 4         | 88     | -1.72030 | 17.9384                  | 0.09687 | 14.8 | 15.3 | 15.6 | 16.4 | 16.9 | 17.9 | 19.2 | 20.0 | 21.6 | 22.3 | 23.9 |
| 7 : 5         | 89     | -1.74719 | 17.9973                  | 0.09732 | 14.9 | 15.4 | 15.6 | 16.4 | 16.9 | 18.0 | 19.3 | 20.1 | 21.7 | 22.4 | 24.0 |
| 7 : 6         | 90     | -1.77285 | 18.0562                  | 0.09778 | 14.9 | 15.4 | 15.7 | 16.4 | 17.0 | 18.1 | 19.4 | 20.2 | 21.8 | 22.6 | 24.2 |
| 7 : 7         | 91     | -1.79727 | 18.1150                  | 0.09824 | 15.0 | 15.4 | 15.7 | 16.5 | 17.0 | 18.1 | 19.4 | 20.3 | 21.9 | 22.7 | 24.3 |
| 7 : 8         | 92     | -1.82040 | 18.1737                  | 0.09871 | 15.0 | 15.5 | 15.8 | 16.5 | 17.1 | 18.2 | 19.5 | 20.4 | 22.0 | 22.8 | 24.5 |
| 7 : 9         | 93     | -1.84224 | 18.2323                  | 0.09918 | 15.0 | 15.5 | 15.8 | 16.6 | 17.1 | 18.2 | 19.6 | 20.4 | 22.1 | 22.9 | 24.6 |
| 7 : 10        | 94     | -1.86274 | 18.2908                  | 0.09966 | 15.1 | 15.6 | 15.9 | 16.6 | 17.2 | 18.3 | 19.7 | 20.5 | 22.2 | 23.0 | 24.8 |
| 7 : 11        | 95     | -1.88189 | 18.3491                  | 0.10014 | 15.1 | 15.6 | 15.9 | 16.7 | 17.2 | 18.3 | 19.7 | 20.6 | 22.3 | 23.2 | 24.9 |
| 8 : 0         | 96     | -1.89968 | 18.4072                  | 0.10063 | 15.2 | 15.7 | 15.9 | 16.7 | 17.3 | 18.4 | 19.8 | 20.7 | 22.5 | 23.3 | 25.1 |
| 8 : 1         | 97     | -1.91614 | 18.4652                  | 0.10112 | 15.2 | 15.7 | 16.0 | 16.8 | 17.3 | 18.5 | 19.9 | 20.8 | 22.6 | 23.4 | 25.2 |
| 8 : 2         | 98     | -1.93128 | 18.5232                  | 0.10162 | 15.2 | 15.7 | 16.0 | 16.8 | 17.4 | 18.5 | 19.9 | 20.8 | 22.7 | 23.5 | 25.4 |
| 8 : 3         | 99     | -1.94514 | 18.5813                  | 0.10211 | 15.3 | 15.8 | 16.1 | 16.9 | 17.4 | 18.6 | 20.0 | 20.9 | 22.8 | 23.6 | 25.6 |
| 8 : 4         | 100    | -1.95773 | 18.6394                  | 0.10262 | 15.3 | 15.8 | 16.1 | 16.9 | 17.5 | 18.6 | 20.1 | 21.0 | 22.9 | 23.8 | 25.7 |
| 8 : 5         | 101    | -1.96908 | 18.6977                  | 0.10312 | 15.4 | 15.9 | 16.2 | 17.0 | 17.5 | 18.7 | 20.1 | 21.1 | 23.0 | 23.9 | 25.9 |
| 8 : 6         | 102    | -1.97920 | 18.7561                  | 0.10363 | 15.4 | 15.9 | 16.2 | 17.0 | 17.6 | 18.8 | 20.2 | 21.2 | 23.1 | 24.0 | 26.0 |
| 8 : 7         | 103    | -1.98813 | 18.8149                  | 0.10414 | 15.4 | 15.9 | 16.2 | 17.1 | 17.6 | 18.8 | 20.3 | 21.2 | 23.2 | 24.1 | 26.2 |
| 8 : 8         | 104    | -1.99588 | 18.8740                  | 0.10465 | 15.5 | 16.0 | 16.3 | 17.1 | 17.7 | 18.9 | 20.4 | 21.3 | 23.3 | 24.2 | 26.3 |
| 8 : 9         | 105    | -2.00248 | 18.9335                  | 0.10516 | 15.5 | 16.0 | 16.3 | 17.2 | 17.7 | 18.9 | 20.4 | 21.4 | 23.4 | 24.4 | 26.5 |
| 8 : 10        | 106    | -2.00795 | 18.9934                  | 0.10568 | 15.6 | 16.1 | 16.4 | 17.2 | 17.8 | 19.0 | 20.5 | 21.5 | 23.5 | 24.5 | 26.7 |
| 8 : 11        | 107    | -2.01231 | 19.0539                  | 0.10619 | 15.6 | 16.1 | 16.4 | 17.3 | 17.8 | 19.1 | 20.6 | 21.6 | 23.6 | 24.6 | 26.8 |
| 9 : 0         | 108    | -2.01558 | 19.1149                  | 0.10671 | 15.6 | 16.2 | 16.4 | 17.3 | 17.9 | 19.1 | 20.7 | 21.7 | 23.7 | 24.7 | 27.0 |
| 9 : 1         | 109    | -2.01780 | 19.1766                  | 0.10722 | 15.7 | 16.2 | 16.5 | 17.3 | 17.9 | 19.2 | 20.7 | 21.7 | 23.8 | 24.8 | 27.1 |
| 9 : 2         | 110    | -2.01897 | 19.2391                  | 0.10774 | 15.7 | 16.2 | 16.5 | 17.4 | 18.0 | 19.2 | 20.8 | 21.8 | 24.0 | 25.0 | 27.3 |
| 9 : 3         | 111    | -2.01912 | 19.3022                  | 0.10825 | 15.7 | 16.3 | 16.6 | 17.4 | 18.0 | 19.3 | 20.9 | 21.9 | 24.1 | 25.1 | 27.4 |
| 9 : 4         | 112    | -2.01828 | 19.3661                  | 0.10877 | 15.8 | 16.3 | 16.6 | 17.5 | 18.1 | 19.4 | 21.0 | 22.0 | 24.2 | 25.2 | 27.6 |
| 9 : 5         | 113    | -2.01647 | 19.4309                  | 0.10928 | 15.8 | 16.4 | 16.7 | 17.5 | 18.1 | 19.4 | 21.0 | 22.1 | 24.3 | 25.3 | 27.7 |
| 9 : 6         | 114    | -2.01371 | 19.4965                  | 0.10979 | 15.9 | 16.4 | 16.7 | 17.6 | 18.2 | 19.5 | 21.1 | 22.2 | 24.4 | 25.5 | 27.9 |
| 9 : 7         | 115    | -2.01004 | 19.5629                  | 0.11029 | 15.9 | 16.4 | 16.8 | 17.7 | 18.3 | 19.6 | 21.2 | 22.3 | 24.5 | 25.6 | 28.1 |
| 9 : 8         | 116    | -2.00546 | 19.6303                  | 0.11080 | 15.9 | 16.5 | 16.8 | 17.7 | 18.3 | 19.6 | 21.3 | 22.4 | 24.6 | 25.7 | 28.2 |
| 9 : 9         | 117    | -2.00000 | 19.6986                  | 0.11130 | 16.0 | 16.5 | 16.9 | 17.8 | 18.4 | 19.7 | 21.4 | 22.5 | 24.7 | 25.8 | 28.4 |

| 5 to 19 years |        |          | Percentiles (MUAC in cm) |         |      |      |      |      |      |      |      |      |      |      |      |
|---------------|--------|----------|--------------------------|---------|------|------|------|------|------|------|------|------|------|------|------|
| Year : Month  | Months | L        | M                        | S       | 1st  | 3rd  | 5th  | 15th | 25th | 50th | 75th | 85th | 95th | 97th | 99th |
| 9 : 10        | 118    | -1.99370 | 19.7679                  | 0.11179 | 16.0 | 16.6 | 16.9 | 17.8 | 18.4 | 19.8 | 21.4 | 22.6 | 24.9 | 26.0 | 28.5 |
| 9 : 11        | 119    | -1.98657 | 19.8383                  | 0.11228 | 16.1 | 16.6 | 17.0 | 17.9 | 18.5 | 19.8 | 21.5 | 22.6 | 25.0 | 26.1 | 28.7 |
| 10 : 0        | 120    | -1.97863 | 19.9096                  | 0.11277 | 16.1 | 16.7 | 17.0 | 17.9 | 18.5 | 19.9 | 21.6 | 22.7 | 25.1 | 26.2 | 28.8 |
| 10 : 1        | 121    | -1.96991 | 19.9821                  | 0.11325 | 16.2 | 16.7 | 17.0 | 18.0 | 18.6 | 20.0 | 21.7 | 22.8 | 25.2 | 26.3 | 29.0 |
| 10 : 2        | 122    | -1.96043 | 20.0556                  | 0.11372 | 16.2 | 16.8 | 17.1 | 18.0 | 18.7 | 20.1 | 21.8 | 22.9 | 25.3 | 26.5 | 29.1 |
| 10 : 3        | 123    | -1.95022 | 20.1303                  | 0.11419 | 16.3 | 16.8 | 17.2 | 18.1 | 18.7 | 20.1 | 21.9 | 23.0 | 25.4 | 26.6 | 29.3 |
| 10 : 4        | 124    | -1.93930 | 20.2062                  | 0.11465 | 16.3 | 16.9 | 17.2 | 18.2 | 18.8 | 20.2 | 22.0 | 23.1 | 25.6 | 26.7 | 29.4 |
| 10 : 5        | 125    | -1.92770 | 20.2833                  | 0.11510 | 16.3 | 16.9 | 17.3 | 18.2 | 18.9 | 20.3 | 22.1 | 23.2 | 25.7 | 26.8 | 29.6 |
| 10 : 6        | 126    | -1.91544 | 20.3617                  | 0.11554 | 16.4 | 17.0 | 17.3 | 18.3 | 18.9 | 20.4 | 22.2 | 23.3 | 25.8 | 27.0 | 29.7 |
| 10 : 7        | 127    | -1.90255 | 20.4412                  | 0.11597 | 16.4 | 17.0 | 17.4 | 18.3 | 19.0 | 20.4 | 22.2 | 23.4 | 25.9 | 27.1 | 29.8 |
| 10 : 8        | 128    | -1.88906 | 20.5220                  | 0.11640 | 16.5 | 17.1 | 17.4 | 18.4 | 19.1 | 20.5 | 22.3 | 23.5 | 26.0 | 27.2 | 30.0 |
| 10 : 9        | 129    | -1.87501 | 20.6041                  | 0.11681 | 16.5 | 17.1 | 17.5 | 18.5 | 19.1 | 20.6 | 22.4 | 23.6 | 26.1 | 27.3 | 30.1 |
| 10 : 10       | 130    | -1.86041 | 20.6874                  | 0.11721 | 16.6 | 17.2 | 17.5 | 18.5 | 19.2 | 20.7 | 22.5 | 23.7 | 26.3 | 27.5 | 30.3 |
| 10 : 11       | 131    | -1.84530 | 20.7720                  | 0.11761 | 16.6 | 17.3 | 17.6 | 18.6 | 19.3 | 20.8 | 22.6 | 23.8 | 26.4 | 27.6 | 30.4 |
| 11 : 0        | 132    | -1.82971 | 20.8578                  | 0.11798 | 16.7 | 17.3 | 17.7 | 18.7 | 19.4 | 20.9 | 22.7 | 24.0 | 26.5 | 27.7 | 30.5 |
| 11 : 1        | 133    | -1.81367 | 20.9450                  | 0.11835 | 16.8 | 17.4 | 17.7 | 18.7 | 19.4 | 20.9 | 22.8 | 24.1 | 26.6 | 27.9 | 30.7 |
| 11 : 2        | 134    | -1.79720 | 21.0334                  | 0.11870 | 16.8 | 17.4 | 17.8 | 18.8 | 19.5 | 21.0 | 22.9 | 24.2 | 26.8 | 28.0 | 30.8 |
| 11 : 3        | 135    | -1.78034 | 21.1232                  | 0.11904 | 16.9 | 17.5 | 17.9 | 18.9 | 19.6 | 21.1 | 23.0 | 24.3 | 26.9 | 28.1 | 30.9 |
| 11 : 4        | 136    | -1.76312 | 21.2143                  | 0.11937 | 16.9 | 17.6 | 17.9 | 19.0 | 19.7 | 21.2 | 23.1 | 24.4 | 27.0 | 28.2 | 31.1 |
| 11 : 5        | 137    | -1.74555 | 21.3067                  | 0.11967 | 17.0 | 17.6 | 18.0 | 19.0 | 19.8 | 21.3 | 23.2 | 24.5 | 27.1 | 28.4 | 31.2 |
| 11 : 6        | 138    | -1.72768 | 21.4005                  | 0.11997 | 17.0 | 17.7 | 18.1 | 19.1 | 19.8 | 21.4 | 23.3 | 24.6 | 27.2 | 28.5 | 31.3 |
| 11 : 7        | 139    | -1.70954 | 21.4956                  | 0.12024 | 17.1 | 17.8 | 18.1 | 19.2 | 19.9 | 21.5 | 23.5 | 24.7 | 27.4 | 28.6 | 31.4 |
| 11 : 8        | 140    | -1.69114 | 21.5921                  | 0.12050 | 17.2 | 17.8 | 18.2 | 19.3 | 20.0 | 21.6 | 23.6 | 24.8 | 27.5 | 28.7 | 31.6 |
| 11 : 9        | 141    | -1.67254 | 21.6898                  | 0.12075 | 17.2 | 17.9 | 18.3 | 19.4 | 20.1 | 21.7 | 23.7 | 25.0 | 27.6 | 28.9 | 31.7 |
| 11 : 10       | 142    | -1.65377 | 21.7888                  | 0.12097 | 17.3 | 18.0 | 18.3 | 19.4 | 20.2 | 21.8 | 23.8 | 25.1 | 27.7 | 29.0 | 31.8 |
| 11 : 11       | 143    | -1.63486 | 21.8890                  | 0.12118 | 17.4 | 18.0 | 18.4 | 19.5 | 20.3 | 21.9 | 23.9 | 25.2 | 27.9 | 29.1 | 31.9 |
| 12 : 0        | 144    | -1.61586 | 21.9904                  | 0.12137 | 17.4 | 18.1 | 18.5 | 19.6 | 20.4 | 22.0 | 24.0 | 25.3 | 28.0 | 29.2 | 32.1 |
| 12 : 1        | 145    | -1.59680 | 22.0929                  | 0.12154 | 17.5 | 18.2 | 18.6 | 19.7 | 20.5 | 22.1 | 24.1 | 25.4 | 28.1 | 29.4 | 32.2 |
| 12 : 2        | 146    | -1.57771 | 22.1965                  | 0.12169 | 17.6 | 18.3 | 18.7 | 19.8 | 20.5 | 22.2 | 24.2 | 25.5 | 28.2 | 29.5 | 32.3 |
| 12 : 3        | 147    | -1.55864 | 22.3012                  | 0.12183 | 17.6 | 18.3 | 18.7 | 19.9 | 20.6 | 22.3 | 24.3 | 25.7 | 28.4 | 29.6 | 32.4 |
| 12 : 4        | 148    | -1.53962 | 22.4068                  | 0.12194 | 17.7 | 18.4 | 18.8 | 20.0 | 20.7 | 22.4 | 24.5 | 25.8 | 28.5 | 29.7 | 32.5 |
| 12 : 5        | 149    | -1.52070 | 22.5134                  | 0.12204 | 17.8 | 18.5 | 18.9 | 20.1 | 20.8 | 22.5 | 24.6 | 25.9 | 28.6 | 29.9 | 32.6 |
| 12 : 6        | 150    | -1.50190 | 22.6209                  | 0.12212 | 17.9 | 18.6 | 19.0 | 20.1 | 20.9 | 22.6 | 24.7 | 26.0 | 28.7 | 30.0 | 32.8 |
| 12 : 7        | 151    | -1.48326 | 22.7293                  | 0.12218 | 17.9 | 18.7 | 19.1 | 20.2 | 21.0 | 22.7 | 24.8 | 26.1 | 28.9 | 30.1 | 32.9 |
| 12 : 8        | 152    | -1.46482 | 22.8385                  | 0.12221 | 18.0 | 18.7 | 19.1 | 20.3 | 21.1 | 22.8 | 24.9 | 26.3 | 29.0 | 30.2 | 33.0 |
| 12 : 9        | 153    | -1.44663 | 22.9485                  | 0.12223 | 18.1 | 18.8 | 19.2 | 20.4 | 21.2 | 22.9 | 25.1 | 26.4 | 29.1 | 30.3 | 33.1 |
| 12 : 10       | 154    | -1.42870 | 23.0593                  | 0.12223 | 18.2 | 18.9 | 19.3 | 20.5 | 21.3 | 23.1 | 25.2 | 26.5 | 29.2 | 30.5 | 33.2 |
| 12 : 11       | 155    | -1.41108 | 23.1707                  | 0.12221 | 18.2 | 19.0 | 19.4 | 20.6 | 21.4 | 23.2 | 25.3 | 26.6 | 29.4 | 30.6 | 33.3 |
| 13 : 0        | 156    | -1.39378 | 23.2827                  | 0.12217 | 18.3 | 19.1 | 19.5 | 20.7 | 21.5 | 23.3 | 25.4 | 26.8 | 29.5 | 30.7 | 33.4 |
| 13 : 1        | 157    | -1.37683 | 23.3952                  | 0.12211 | 18.4 | 19.2 | 19.6 | 20.8 | 21.6 | 23.4 | 25.5 | 26.9 | 29.6 | 30.8 | 33.5 |
| 13 : 2        | 158    | -1.36024 | 23.5082                  | 0.12204 | 18.5 | 19.3 | 19.7 | 20.9 | 21.7 | 23.5 | 25.7 | 27.0 | 29.7 | 31.0 | 33.7 |
| 13 : 3        | 159    | -1.34404 | 23.6215                  | 0.12194 | 18.6 | 19.3 | 19.8 | 21.0 | 21.8 | 23.6 | 25.8 | 27.1 | 29.8 | 31.1 | 33.8 |
| 13 : 4        | 160    | -1.32825 | 23.7350                  | 0.12183 | 18.7 | 19.4 | 19.9 | 21.1 | 22.0 | 23.7 | 25.9 | 27.3 | 30.0 | 31.2 | 33.9 |
| 13 : 5        | 161    | -1.31289 | 23.8488                  | 0.12170 | 18.7 | 19.5 | 20.0 | 21.2 | 22.1 | 23.8 | 26.0 | 27.4 | 30.1 | 31.3 | 34.0 |
| 13 : 6        | 162    | -1.29798 | 23.9626                  | 0.12155 | 18.8 | 19.6 | 20.1 | 21.3 | 22.2 | 24.0 | 26.1 | 27.5 | 30.2 | 31.4 | 34.1 |
| 13 : 7        | 163    | -1.28355 | 24.0765                  | 0.12138 | 18.9 | 19.7 | 20.2 | 21.4 | 22.3 | 24.1 | 26.3 | 27.6 | 30.3 | 31.5 | 34.2 |
| 13 : 8        | 164    | -1.26961 | 24.1903                  | 0.12120 | 19.0 | 19.8 | 20.3 | 21.5 | 22.4 | 24.2 | 26.4 | 27.7 | 30.4 | 31.7 | 34.3 |
| 13 : 9        | 165    | -1.25619 | 24.3039                  | 0.12101 | 19.1 | 19.9 | 20.3 | 21.6 | 22.5 | 24.3 | 26.5 | 27.9 | 30.6 | 31.8 | 34.4 |
| 13 : 10       | 166    | -1.24331 | 24.4174                  | 0.12079 | 19.2 | 20.0 | 20.4 | 21.7 | 22.6 | 24.4 | 26.6 | 28.0 | 30.7 | 31.9 | 34.5 |
| 13 : 11       | 167    | -1.23099 | 24.5305                  | 0.12057 | 19.3 | 20.1 | 20.5 | 21.8 | 22.7 | 24.5 | 26.7 | 28.1 | 30.8 | 32.0 | 34.6 |
| 14 : 0        | 168    | -1.21926 | 24.6432                  | 0.12032 | 19.4 | 20.2 | 20.6 | 21.9 | 22.8 | 24.6 | 26.8 | 28.2 | 30.9 | 32.1 | 34.7 |
| 14 : 1        | 169    | -1.20812 | 24.7555                  | 0.12007 | 19.5 | 20.3 | 20.7 | 22.0 | 22.9 | 24.8 | 27.0 | 28.3 | 31.0 | 32.2 | 34.8 |
| 14 : 2        | 170    | -1.19761 | 24.8672                  | 0.11980 | 19.6 | 20.4 | 20.8 | 22.2 | 23.0 | 24.9 | 27.1 | 28.4 | 31.1 | 32.3 | 34.9 |
| 14 : 3        | 171    | -1.18774 | 24.9784                  | 0.11952 | 19.6 | 20.5 | 20.9 | 22.3 | 23.1 | 25.0 | 27.2 | 28.6 | 31.2 | 32.4 | 35.0 |
| 14 : 4        | 172    | -1.17852 | 25.0890                  | 0.11922 | 19.7 | 20.6 | 21.0 | 22.4 | 23.2 | 25.1 | 27.3 | 28.7 | 31.4 | 32.6 | 35.1 |
| 14 : 5        | 173    | -1.16998 | 25.1989                  | 0.11892 | 19.8 | 20.7 | 21.1 | 22.5 | 23.3 | 25.2 | 27.4 | 28.8 | 31.5 | 32.7 | 35.2 |
| 14 : 6        | 174    | -1.16213 | 25.3082                  | 0.11860 | 19.9 | 20.8 | 21.2 | 22.6 | 23.4 | 25.3 | 27.5 | 28.9 | 31.6 | 32.8 | 35.3 |
| 14 : 7        | 175    | -1.15499 | 25.4167                  | 0.11828 | 20.0 | 20.9 | 21.3 | 22.7 | 23.6 | 25.4 | 27.6 | 29.0 | 31.7 | 32.9 | 35.4 |
| 14 : 8        | 176    | -1.14858 | 25.5245                  | 0.11795 | 20.1 | 20.9 | 21.4 | 22.8 | 23.7 | 25.5 | 27.7 | 29.1 | 31.8 | 33.0 | 35.5 |

| 5 to 19 years |        |          | Percentiles (MUAC in cm) |         |      |      |      |      |      |      |      |      |      |      |      |
|---------------|--------|----------|--------------------------|---------|------|------|------|------|------|------|------|------|------|------|------|
| Year : Month  | Months | L        | M                        | S       | 1st  | 3rd  | 5th  | 15th | 25th | 50th | 75th | 85th | 95th | 97th | 99th |
| 14 : 9        | 177    | -1.14291 | 25.6314                  | 0.11761 | 20.2 | 21.0 | 21.5 | 22.9 | 23.8 | 25.6 | 27.9 | 29.2 | 31.9 | 33.1 | 35.6 |
| 14 : 10       | 178    | -1.13800 | 25.7375                  | 0.11726 | 20.3 | 21.1 | 21.6 | 23.0 | 23.9 | 25.7 | 28.0 | 29.3 | 32.0 | 33.2 | 35.7 |
| 14 : 11       | 179    | -1.13388 | 25.8427                  | 0.11691 | 20.4 | 21.2 | 21.7 | 23.1 | 24.0 | 25.8 | 28.1 | 29.4 | 32.1 | 33.3 | 35.8 |
| 15 : 0        | 180    | -1.13055 | 25.9470                  | 0.11655 | 20.5 | 21.3 | 21.8 | 23.2 | 24.1 | 25.9 | 28.2 | 29.5 | 32.2 | 33.4 | 35.9 |
| 15 : 1        | 181    | -1.12804 | 26.0503                  | 0.11619 | 20.6 | 21.4 | 21.9 | 23.3 | 24.2 | 26.1 | 28.3 | 29.6 | 32.3 | 33.5 | 36.0 |
| 15 : 2        | 182    | -1.12636 | 26.1526                  | 0.11583 | 20.7 | 21.5 | 22.0 | 23.4 | 24.3 | 26.2 | 28.4 | 29.8 | 32.4 | 33.6 | 36.1 |
| 15 : 3        | 183    | -1.12553 | 26.2538                  | 0.11546 | 20.8 | 21.6 | 22.1 | 23.5 | 24.4 | 26.3 | 28.5 | 29.9 | 32.5 | 33.7 | 36.1 |
| 15 : 4        | 184    | -1.12555 | 26.3539                  | 0.11510 | 20.9 | 21.7 | 22.2 | 23.6 | 24.5 | 26.4 | 28.6 | 30.0 | 32.6 | 33.8 | 36.2 |
| 15 : 5        | 185    | -1.12638 | 26.4529                  | 0.11473 | 20.9 | 21.8 | 22.3 | 23.7 | 24.6 | 26.5 | 28.7 | 30.1 | 32.7 | 33.9 | 36.3 |
| 15 : 6        | 186    | -1.12800 | 26.5508                  | 0.11436 | 21.0 | 21.9 | 22.4 | 23.8 | 24.7 | 26.6 | 28.8 | 30.2 | 32.8 | 34.0 | 36.4 |
| 15 : 7        | 187    | -1.13037 | 26.6476                  | 0.11399 | 21.1 | 22.0 | 22.5 | 23.9 | 24.8 | 26.6 | 28.9 | 30.2 | 32.9 | 34.1 | 36.5 |
| 15 : 8        | 188    | -1.13345 | 26.7432                  | 0.11362 | 21.2 | 22.1 | 22.6 | 23.9 | 24.8 | 26.7 | 29.0 | 30.3 | 33.0 | 34.2 | 36.6 |
| 15 : 9        | 189    | -1.13722 | 26.8377                  | 0.11326 | 21.3 | 22.2 | 22.7 | 24.0 | 24.9 | 26.8 | 29.1 | 30.4 | 33.1 | 34.3 | 36.7 |
| 15 : 10       | 190    | -1.14163 | 26.9311                  | 0.11290 | 21.4 | 22.3 | 22.8 | 24.1 | 25.0 | 26.9 | 29.2 | 30.5 | 33.2 | 34.3 | 36.8 |
| 15 : 11       | 191    | -1.14666 | 27.0233                  | 0.11254 | 21.5 | 22.4 | 22.8 | 24.2 | 25.1 | 27.0 | 29.3 | 30.6 | 33.3 | 34.4 | 36.9 |
| 16 : 0        | 192    | -1.15227 | 27.1144                  | 0.11219 | 21.6 | 22.4 | 22.9 | 24.3 | 25.2 | 27.1 | 29.3 | 30.7 | 33.4 | 34.5 | 37.0 |
| 16 : 1        | 193    | -1.15843 | 27.2043                  | 0.11184 | 21.7 | 22.5 | 23.0 | 24.4 | 25.3 | 27.2 | 29.4 | 30.8 | 33.5 | 34.6 | 37.1 |
| 16 : 2        | 194    | -1.16511 | 27.2930                  | 0.11150 | 21.8 | 22.6 | 23.1 | 24.5 | 25.4 | 27.3 | 29.5 | 30.9 | 33.5 | 34.7 | 37.2 |
| 16 : 3        | 195    | -1.17226 | 27.3805                  | 0.11116 | 21.8 | 22.7 | 23.2 | 24.6 | 25.5 | 27.4 | 29.6 | 31.0 | 33.6 | 34.8 | 37.3 |
| 16 : 4        | 196    | -1.17986 | 27.4669                  | 0.11083 | 21.9 | 22.8 | 23.3 | 24.7 | 25.6 | 27.5 | 29.7 | 31.1 | 33.7 | 34.9 | 37.4 |
| 16 : 5        | 197    | -1.18788 | 27.5520                  | 0.11051 | 22.0 | 22.9 | 23.4 | 24.7 | 25.7 | 27.6 | 29.8 | 31.2 | 33.8 | 35.0 | 37.4 |
| 16 : 6        | 198    | -1.19627 | 27.6359                  | 0.11020 | 22.1 | 23.0 | 23.5 | 24.8 | 25.7 | 27.6 | 29.9 | 31.2 | 33.9 | 35.1 | 37.5 |
| 16 : 7        | 199    | -1.20499 | 27.7186                  | 0.10990 | 22.2 | 23.0 | 23.5 | 24.9 | 25.8 | 27.7 | 30.0 | 31.3 | 34.0 | 35.2 | 37.6 |
| 16 : 8        | 200    | -1.21395 | 27.8002                  | 0.10960 | 22.3 | 23.1 | 23.6 | 25.0 | 25.9 | 27.8 | 30.0 | 31.4 | 34.1 | 35.2 | 37.7 |
| 16 : 9        | 201    | -1.22310 | 27.8805                  | 0.10932 | 22.3 | 23.2 | 23.7 | 25.1 | 26.0 | 27.9 | 30.1 | 31.5 | 34.2 | 35.3 | 37.8 |
| 16 : 10       | 202    | -1.23235 | 27.9596                  | 0.10904 | 22.4 | 23.3 | 23.8 | 25.2 | 26.1 | 28.0 | 30.2 | 31.6 | 34.2 | 35.4 | 37.9 |
| 16 : 11       | 203    | -1.24164 | 28.0375                  | 0.10878 | 22.5 | 23.4 | 23.9 | 25.2 | 26.1 | 28.0 | 30.3 | 31.7 | 34.3 | 35.5 | 38.0 |
| 17 : 0        | 204    | -1.25090 | 28.1142                  | 0.10852 | 22.6 | 23.4 | 23.9 | 25.3 | 26.2 | 28.1 | 30.4 | 31.7 | 34.4 | 35.6 | 38.1 |
| 17 : 1        | 205    | -1.26004 | 28.1898                  | 0.10827 | 22.7 | 23.5 | 24.0 | 25.4 | 26.3 | 28.2 | 30.4 | 31.8 | 34.5 | 35.7 | 38.2 |
| 17 : 2        | 206    | -1.26901 | 28.2642                  | 0.10803 | 22.7 | 23.6 | 24.1 | 25.5 | 26.4 | 28.3 | 30.5 | 31.9 | 34.6 | 35.8 | 38.3 |
| 17 : 3        | 207    | -1.27772 | 28.3374                  | 0.10780 | 22.8 | 23.7 | 24.2 | 25.5 | 26.4 | 28.3 | 30.6 | 32.0 | 34.6 | 35.8 | 38.3 |
| 17 : 4        | 208    | -1.28612 | 28.4094                  | 0.10758 | 22.9 | 23.7 | 24.2 | 25.6 | 26.5 | 28.4 | 30.7 | 32.0 | 34.7 | 35.9 | 38.4 |
| 17 : 5        | 209    | -1.29412 | 28.4802                  | 0.10737 | 22.9 | 23.8 | 24.3 | 25.7 | 26.6 | 28.5 | 30.7 | 32.1 | 34.8 | 36.0 | 38.5 |
| 17 : 6        | 210    | -1.30165 | 28.5499                  | 0.10716 | 23.0 | 23.9 | 24.4 | 25.7 | 26.6 | 28.5 | 30.8 | 32.2 | 34.9 | 36.1 | 38.6 |
| 17 : 7        | 211    | -1.30865 | 28.6184                  | 0.10697 | 23.1 | 23.9 | 24.4 | 25.8 | 26.7 | 28.6 | 30.9 | 32.3 | 35.0 | 36.1 | 38.7 |
| 17 : 8        | 212    | -1.31504 | 28.6858                  | 0.10679 | 23.1 | 24.0 | 24.5 | 25.9 | 26.8 | 28.7 | 30.9 | 32.3 | 35.0 | 36.2 | 38.7 |
| 17 : 9        | 213    | -1.32075 | 28.7520                  | 0.10661 | 23.2 | 24.1 | 24.6 | 25.9 | 26.8 | 28.8 | 31.0 | 32.4 | 35.1 | 36.3 | 38.8 |
| 17 : 10       | 214    | -1.32576 | 28.8170                  | 0.10645 | 23.3 | 24.1 | 24.6 | 26.0 | 26.9 | 28.8 | 31.1 | 32.5 | 35.2 | 36.4 | 38.9 |
| 17 : 11       | 215    | -1.33005 | 28.8809                  | 0.10629 | 23.3 | 24.2 | 24.7 | 26.1 | 27.0 | 28.9 | 31.1 | 32.5 | 35.2 | 36.4 | 39.0 |
| 18 : 0        | 216    | -1.33359 | 28.9437                  | 0.10614 | 23.4 | 24.2 | 24.7 | 26.1 | 27.0 | 28.9 | 31.2 | 32.6 | 35.3 | 36.5 | 39.0 |
| 18 : 1        | 217    | -1.33637 | 29.0053                  | 0.10600 | 23.4 | 24.3 | 24.8 | 26.2 | 27.1 | 29.0 | 31.3 | 32.7 | 35.4 | 36.6 | 39.1 |
| 18 : 2        | 218    | -1.33836 | 29.0657                  | 0.10587 | 23.5 | 24.4 | 24.9 | 26.2 | 27.2 | 29.1 | 31.3 | 32.7 | 35.4 | 36.6 | 39.2 |
| 18 : 3        | 219    | -1.33955 | 29.1250                  | 0.10575 | 23.5 | 24.4 | 24.9 | 26.3 | 27.2 | 29.1 | 31.4 | 32.8 | 35.5 | 36.7 | 39.3 |
| 18 : 4        | 220    | -1.33992 | 29.1832                  | 0.10563 | 23.6 | 24.5 | 25.0 | 26.4 | 27.3 | 29.2 | 31.5 | 32.8 | 35.6 | 36.8 | 39.3 |
| 18 : 5        | 221    | -1.33944 | 29.2402                  | 0.10552 | 23.6 | 24.5 | 25.0 | 26.4 | 27.3 | 29.2 | 31.5 | 32.9 | 35.6 | 36.8 | 39.4 |
| 18 : 6        | 222    | -1.33810 | 29.2961                  | 0.10542 | 23.7 | 24.6 | 25.1 | 26.5 | 27.4 | 29.3 | 31.6 | 33.0 | 35.7 | 36.9 | 39.4 |
| 18 : 7        | 223    | -1.33587 | 29.3508                  | 0.10533 | 23.7 | 24.6 | 25.1 | 26.5 | 27.4 | 29.4 | 31.6 | 33.0 | 35.7 | 36.9 | 39.5 |
| 18 : 8        | 224    | -1.33274 | 29.4044                  | 0.10524 | 23.8 | 24.7 | 25.2 | 26.6 | 27.5 | 29.4 | 31.7 | 33.1 | 35.8 | 37.0 | 39.5 |
| 18 : 9        | 225    | -1.32869 | 29.4569                  | 0.10516 | 23.8 | 24.7 | 25.2 | 26.6 | 27.5 | 29.5 | 31.7 | 33.1 | 35.9 | 37.1 | 39.6 |
| 18 : 10       | 226    | -1.32369 | 29.5082                  | 0.10508 | 23.9 | 24.8 | 25.3 | 26.7 | 27.6 | 29.5 | 31.8 | 33.2 | 35.9 | 37.1 | 39.6 |
| 18 : 11       | 227    | -1.31773 | 29.5584                  | 0.10501 | 23.9 | 24.8 | 25.3 | 26.7 | 27.6 | 29.6 | 31.8 | 33.2 | 36.0 | 37.2 | 39.7 |
| 19 : 0        | 228    | -1.31080 | 29.6074                  | 0.10495 | 24.0 | 24.8 | 25.3 | 26.7 | 27.7 | 29.6 | 31.9 | 33.3 | 36.0 | 37.2 | 39.7 |

## Mid-upper arm circumference-for-age GIRLS (5 to 19 years)

| 5 to 19 years |        |          | Percentiles (MUAC in cm) |         |      |      |      |      |      |      |      |      |      |      |      |
|---------------|--------|----------|--------------------------|---------|------|------|------|------|------|------|------|------|------|------|------|
| Year : Month  | Months | L        | M                        | S       | 1st  | 3rd  | 5th  | 15th | 25th | 50th | 75th | 85th | 95th | 97th | 99th |
| 5 : 0         | 60     | -0.49271 | 16.8168                  | 0.09338 | 13.7 | 14.2 | 14.5 | 15.3 | 15.8 | 16.8 | 17.9 | 18.6 | 19.7 | 20.2 | 21.2 |
| 5 : 1         | 61     | -0.50464 | 16.8623                  | 0.09380 | 13.7 | 14.2 | 14.5 | 15.3 | 15.8 | 16.9 | 18.0 | 18.6 | 19.8 | 20.3 | 21.2 |
| 5 : 2         | 62     | -0.51656 | 16.9078                  | 0.09423 | 13.7 | 14.3 | 14.6 | 15.4 | 15.9 | 16.9 | 18.0 | 18.7 | 19.9 | 20.4 | 21.3 |
| 5 : 3         | 63     | -0.52844 | 16.9532                  | 0.09467 | 13.8 | 14.3 | 14.6 | 15.4 | 15.9 | 17.0 | 18.1 | 18.7 | 19.9 | 20.4 | 21.4 |
| 5 : 4         | 64     | -0.54030 | 16.9986                  | 0.09512 | 13.8 | 14.3 | 14.6 | 15.4 | 16.0 | 17.0 | 18.1 | 18.8 | 20.0 | 20.5 | 21.5 |
| 5 : 5         | 65     | -0.55212 | 17.0440                  | 0.09557 | 13.8 | 14.4 | 14.7 | 15.5 | 16.0 | 17.0 | 18.2 | 18.9 | 20.1 | 20.6 | 21.6 |
| 5 : 6         | 66     | -0.56392 | 17.0895                  | 0.09603 | 13.8 | 14.4 | 14.7 | 15.5 | 16.0 | 17.1 | 18.3 | 18.9 | 20.2 | 20.7 | 21.7 |
| 5 : 7         | 67     | -0.57568 | 17.1350                  | 0.09649 | 13.9 | 14.4 | 14.7 | 15.5 | 16.1 | 17.1 | 18.3 | 19.0 | 20.2 | 20.8 | 21.8 |
| 5 : 8         | 68     | -0.58740 | 17.1807                  | 0.09696 | 13.9 | 14.4 | 14.8 | 15.6 | 16.1 | 17.2 | 18.4 | 19.1 | 20.3 | 20.8 | 21.9 |
| 5 : 9         | 69     | -0.59908 | 17.2265                  | 0.09744 | 13.9 | 14.5 | 14.8 | 15.6 | 16.2 | 17.2 | 18.4 | 19.1 | 20.4 | 20.9 | 22.0 |
| 5 : 10        | 70     | -0.61073 | 17.2725                  | 0.09793 | 14.0 | 14.5 | 14.8 | 15.7 | 16.2 | 17.3 | 18.5 | 19.2 | 20.5 | 21.0 | 22.1 |
| 5 : 11        | 71     | -0.62233 | 17.3188                  | 0.09842 | 14.0 | 14.5 | 14.8 | 15.7 | 16.2 | 17.3 | 18.5 | 19.2 | 20.5 | 21.1 | 22.2 |
| 6 : 0         | 72     | -0.63388 | 17.3653                  | 0.09892 | 14.0 | 14.6 | 14.9 | 15.7 | 16.3 | 17.4 | 18.6 | 19.3 | 20.6 | 21.2 | 22.3 |
| 6 : 1         | 73     | -0.64539 | 17.4122                  | 0.09943 | 14.0 | 14.6 | 14.9 | 15.8 | 16.3 | 17.4 | 18.6 | 19.4 | 20.7 | 21.3 | 22.4 |
| 6 : 2         | 74     | -0.65684 | 17.4594                  | 0.09995 | 14.1 | 14.6 | 14.9 | 15.8 | 16.3 | 17.5 | 18.7 | 19.4 | 20.8 | 21.3 | 22.5 |
| 6 : 3         | 75     | -0.66825 | 17.5071                  | 0.10047 | 14.1 | 14.7 | 15.0 | 15.8 | 16.4 | 17.5 | 18.8 | 19.5 | 20.9 | 21.4 | 22.6 |
| 6 : 4         | 76     | -0.67959 | 17.5551                  | 0.10100 | 14.1 | 14.7 | 15.0 | 15.9 | 16.4 | 17.6 | 18.8 | 19.6 | 20.9 | 21.5 | 22.7 |
| 6 : 5         | 77     | -0.69089 | 17.6037                  | 0.10154 | 14.1 | 14.7 | 15.0 | 15.9 | 16.5 | 17.6 | 18.9 | 19.6 | 21.0 | 21.6 | 22.8 |
| 6 : 6         | 78     | -0.70212 | 17.6528                  | 0.10208 | 14.2 | 14.7 | 15.1 | 15.9 | 16.5 | 17.7 | 18.9 | 19.7 | 21.1 | 21.7 | 22.9 |
| 6 : 7         | 79     | -0.71329 | 17.7024                  | 0.10263 | 14.2 | 14.8 | 15.1 | 16.0 | 16.5 | 17.7 | 19.0 | 19.8 | 21.2 | 21.8 | 23.0 |
| 6 : 8         | 80     | -0.72439 | 17.7527                  | 0.10319 | 14.2 | 14.8 | 15.1 | 16.0 | 16.6 | 17.8 | 19.1 | 19.8 | 21.3 | 21.9 | 23.1 |
| 6 : 9         | 81     | -0.73543 | 17.8036                  | 0.10375 | 14.3 | 14.8 | 15.2 | 16.1 | 16.6 | 17.8 | 19.1 | 19.9 | 21.4 | 22.0 | 23.2 |
| 6 : 10        | 82     | -0.74641 | 17.8551                  | 0.10433 | 14.3 | 14.9 | 15.2 | 16.1 | 16.7 | 17.9 | 19.2 | 20.0 | 21.5 | 22.1 | 23.3 |
| 6 : 11        | 83     | -0.75731 | 17.9073                  | 0.10490 | 14.3 | 14.9 | 15.2 | 16.1 | 16.7 | 17.9 | 19.3 | 20.1 | 21.5 | 22.2 | 23.5 |
| 7 : 0         | 84     | -0.76814 | 17.9602                  | 0.10549 | 14.3 | 14.9 | 15.3 | 16.2 | 16.8 | 18.0 | 19.3 | 20.1 | 21.6 | 22.3 | 23.6 |
| 7 : 1         | 85     | -0.77891 | 18.0138                  | 0.10608 | 14.4 | 15.0 | 15.3 | 16.2 | 16.8 | 18.0 | 19.4 | 20.2 | 21.7 | 22.4 | 23.7 |
| 7 : 2         | 86     | -0.78960 | 18.0680                  | 0.10667 | 14.4 | 15.0 | 15.3 | 16.3 | 16.8 | 18.1 | 19.5 | 20.3 | 21.8 | 22.5 | 23.8 |
| 7 : 3         | 87     | -0.80022 | 18.1230                  | 0.10727 | 14.4 | 15.0 | 15.4 | 16.3 | 16.9 | 18.1 | 19.5 | 20.4 | 21.9 | 22.6 | 23.9 |
| 7 : 4         | 88     | -0.81076 | 18.1787                  | 0.10788 | 14.5 | 15.1 | 15.4 | 16.3 | 16.9 | 18.2 | 19.6 | 20.4 | 22.0 | 22.7 | 24.1 |
| 7 : 5         | 89     | -0.82123 | 18.2351                  | 0.10848 | 14.5 | 15.1 | 15.4 | 16.4 | 17.0 | 18.2 | 19.7 | 20.5 | 22.1 | 22.8 | 24.2 |
| 7 : 6         | 90     | -0.83162 | 18.2923                  | 0.10909 | 14.5 | 15.1 | 15.5 | 16.4 | 17.0 | 18.3 | 19.7 | 20.6 | 22.2 | 22.9 | 24.3 |
| 7 : 7         | 91     | -0.84193 | 18.3502                  | 0.10971 | 14.6 | 15.2 | 15.5 | 16.5 | 17.1 | 18.4 | 19.8 | 20.7 | 22.3 | 23.0 | 24.5 |
| 7 : 8         | 92     | -0.85217 | 18.4088                  | 0.11033 | 14.6 | 15.2 | 15.6 | 16.5 | 17.1 | 18.4 | 19.9 | 20.8 | 22.4 | 23.1 | 24.6 |
| 7 : 9         | 93     | -0.86233 | 18.4683                  | 0.11094 | 14.6 | 15.2 | 15.6 | 16.6 | 17.2 | 18.5 | 20.0 | 20.8 | 22.5 | 23.2 | 24.7 |
| 7 : 10        | 94     | -0.87240 | 18.5285                  | 0.11157 | 14.7 | 15.3 | 15.6 | 16.6 | 17.2 | 18.5 | 20.0 | 20.9 | 22.6 | 23.4 | 24.9 |
| 7 : 11        | 95     | -0.88239 | 18.5895                  | 0.11219 | 14.7 | 15.3 | 15.7 | 16.6 | 17.3 | 18.6 | 20.1 | 21.0 | 22.7 | 23.5 | 25.0 |
| 8 : 0         | 96     | -0.89230 | 18.6514                  | 0.11281 | 14.7 | 15.4 | 15.7 | 16.7 | 17.3 | 18.7 | 20.2 | 21.1 | 22.8 | 23.6 | 25.2 |
| 8 : 1         | 97     | -0.90213 | 18.7140                  | 0.11343 | 14.8 | 15.4 | 15.7 | 16.7 | 17.4 | 18.7 | 20.3 | 21.2 | 23.0 | 23.7 | 25.3 |
| 8 : 2         | 98     | -0.91187 | 18.7773                  | 0.11405 | 14.8 | 15.4 | 15.8 | 16.8 | 17.4 | 18.8 | 20.3 | 21.3 | 23.1 | 23.8 | 25.4 |
| 8 : 3         | 99     | -0.92153 | 18.8415                  | 0.11467 | 14.8 | 15.5 | 15.8 | 16.8 | 17.5 | 18.8 | 20.4 | 21.4 | 23.2 | 24.0 | 25.6 |
| 8 : 4         | 100    | -0.93111 | 18.9063                  | 0.11529 | 14.9 | 15.5 | 15.9 | 16.9 | 17.5 | 18.9 | 20.5 | 21.5 | 23.3 | 24.1 | 25.7 |
| 8 : 5         | 101    | -0.94061 | 18.9719                  | 0.11590 | 14.9 | 15.6 | 15.9 | 16.9 | 17.6 | 19.0 | 20.6 | 21.5 | 23.4 | 24.2 | 25.9 |
| 8 : 6         | 102    | -0.95002 | 19.0382                  | 0.11651 | 15.0 | 15.6 | 16.0 | 17.0 | 17.6 | 19.0 | 20.7 | 21.6 | 23.5 | 24.3 | 26.0 |
| 8 : 7         | 103    | -0.95935 | 19.1052                  | 0.11712 | 15.0 | 15.6 | 16.0 | 17.0 | 17.7 | 19.1 | 20.7 | 21.7 | 23.6 | 24.5 | 26.2 |
| 8 : 8         | 104    | -0.96860 | 19.1729                  | 0.11772 | 15.0 | 15.7 | 16.1 | 17.1 | 17.8 | 19.2 | 20.8 | 21.8 | 23.8 | 24.6 | 26.4 |
| 8 : 9         | 105    | -0.97776 | 19.2412                  | 0.11831 | 15.1 | 15.7 | 16.1 | 17.1 | 17.8 | 19.2 | 20.9 | 21.9 | 23.9 | 24.7 | 26.5 |
| 8 : 10        | 106    | -0.98685 | 19.3102                  | 0.11890 | 15.1 | 15.8 | 16.1 | 17.2 | 17.9 | 19.3 | 21.0 | 22.0 | 24.0 | 24.9 | 26.7 |
| 8 : 11        | 107    | -0.99585 | 19.3799                  | 0.11948 | 15.2 | 15.8 | 16.2 | 17.2 | 17.9 | 19.4 | 21.1 | 22.1 | 24.1 | 25.0 | 26.8 |
| 9 : 0         | 108    | -1.00477 | 19.4501                  | 0.12006 | 15.2 | 15.9 | 16.2 | 17.3 | 18.0 | 19.5 | 21.2 | 22.2 | 24.2 | 25.1 | 27.0 |
| 9 : 1         | 109    | -1.01360 | 19.5210                  | 0.12062 | 15.2 | 15.9 | 16.3 | 17.4 | 18.1 | 19.5 | 21.2 | 22.3 | 24.4 | 25.3 | 27.2 |
| 9 : 2         | 110    | -1.02236 | 19.5924                  | 0.12117 | 15.3 | 16.0 | 16.3 | 17.4 | 18.1 | 19.6 | 21.3 | 22.4 | 24.5 | 25.4 | 27.3 |
| 9 : 3         | 111    | -1.03103 | 19.6645                  | 0.12171 | 15.3 | 16.0 | 16.4 | 17.5 | 18.2 | 19.7 | 21.4 | 22.5 | 24.6 | 25.5 | 27.5 |
| 9 : 4         | 112    | -1.03963 | 19.7371                  | 0.12224 | 15.4 | 16.1 | 16.4 | 17.5 | 18.2 | 19.7 | 21.5 | 22.6 | 24.7 | 25.7 | 27.6 |
| 9 : 5         | 113    | -1.04814 | 19.8104                  | 0.12276 | 15.4 | 16.1 | 16.5 | 17.6 | 18.3 | 19.8 | 21.6 | 22.7 | 24.9 | 25.8 | 27.8 |
| 9 : 6         | 114    | -1.05657 | 19.8842                  | 0.12327 | 15.5 | 16.2 | 16.5 | 17.6 | 18.4 | 19.9 | 21.7 | 22.8 | 25.0 | 25.9 | 28.0 |
| 9 : 7         | 115    | -1.06493 | 19.9586                  | 0.12376 | 15.5 | 16.2 | 16.6 | 17.7 | 18.4 | 20.0 | 21.8 | 22.9 | 25.1 | 26.1 | 28.1 |
| 9 : 8         | 116    | -1.07321 | 20.0336                  | 0.12424 | 15.6 | 16.3 | 16.7 | 17.8 | 18.5 | 20.0 | 21.9 | 23.0 | 25.2 | 26.2 | 28.3 |
| 9 : 9         | 117    | -1.08141 | 20.1093                  | 0.12471 | 15.6 | 16.3 | 16.7 | 17.8 | 18.6 | 20.1 | 22.0 | 23.1 | 25.4 | 26.4 | 28.5 |

| 5 to 19 years |        |          | Percentiles (MUAC in cm) |         |      |      |      |      |      |      |      |      |      |      |      |
|---------------|--------|----------|--------------------------|---------|------|------|------|------|------|------|------|------|------|------|------|
| Year : Month  | Months | L        | M                        | S       | 1st  | 3rd  | 5th  | 15th | 25th | 50th | 75th | 85th | 95th | 97th | 99th |
| 9 : 10        | 118    | -1.08954 | 20.1855                  | 0.12515 | 15.7 | 16.4 | 16.8 | 17.9 | 18.6 | 20.2 | 22.1 | 23.2 | 25.5 | 26.5 | 28.6 |
| 9 : 11        | 119    | -1.09759 | 20.2623                  | 0.12559 | 15.7 | 16.4 | 16.8 | 17.9 | 18.7 | 20.3 | 22.1 | 23.3 | 25.6 | 26.6 | 28.8 |
| 10 : 0        | 120    | -1.10557 | 20.3398                  | 0.12601 | 15.8 | 16.5 | 16.9 | 18.0 | 18.8 | 20.3 | 22.2 | 23.4 | 25.7 | 26.8 | 29.0 |
| 10 : 1        | 121    | -1.11347 | 20.4178                  | 0.12641 | 15.8 | 16.5 | 16.9 | 18.1 | 18.8 | 20.4 | 22.3 | 23.5 | 25.9 | 26.9 | 29.2 |
| 10 : 2        | 122    | -1.12131 | 20.4965                  | 0.12679 | 15.9 | 16.6 | 17.0 | 18.1 | 18.9 | 20.5 | 22.4 | 23.6 | 26.0 | 27.1 | 29.3 |
| 10 : 3        | 123    | -1.12907 | 20.5758                  | 0.12716 | 15.9 | 16.6 | 17.1 | 18.2 | 19.0 | 20.6 | 22.5 | 23.7 | 26.1 | 27.2 | 29.5 |
| 10 : 4        | 124    | -1.13676 | 20.6557                  | 0.12751 | 16.0 | 16.7 | 17.1 | 18.3 | 19.0 | 20.7 | 22.6 | 23.8 | 26.2 | 27.3 | 29.7 |
| 10 : 5        | 125    | -1.14439 | 20.7362                  | 0.12783 | 16.1 | 16.8 | 17.2 | 18.3 | 19.1 | 20.7 | 22.7 | 23.9 | 26.4 | 27.5 | 29.8 |
| 10 : 6        | 126    | -1.15194 | 20.8172                  | 0.12814 | 16.1 | 16.8 | 17.2 | 18.4 | 19.2 | 20.8 | 22.8 | 24.0 | 26.5 | 27.6 | 30.0 |
| 10 : 7        | 127    | -1.15943 | 20.8989                  | 0.12843 | 16.2 | 16.9 | 17.3 | 18.5 | 19.2 | 20.9 | 22.9 | 24.1 | 26.6 | 27.7 | 30.2 |
| 10 : 8        | 128    | -1.16685 | 20.9810                  | 0.12870 | 16.2 | 17.0 | 17.4 | 18.5 | 19.3 | 21.0 | 23.0 | 24.3 | 26.8 | 27.9 | 30.3 |
| 10 : 9        | 129    | -1.17420 | 21.0637                  | 0.12895 | 16.3 | 17.0 | 17.4 | 18.6 | 19.4 | 21.1 | 23.1 | 24.4 | 26.9 | 28.0 | 30.5 |
| 10 : 10       | 130    | -1.18149 | 21.1468                  | 0.12918 | 16.4 | 17.1 | 17.5 | 18.7 | 19.5 | 21.1 | 23.2 | 24.5 | 27.0 | 28.2 | 30.7 |
| 10 : 11       | 131    | -1.18871 | 21.2304                  | 0.12939 | 16.4 | 17.1 | 17.6 | 18.7 | 19.5 | 21.2 | 23.3 | 24.6 | 27.1 | 28.3 | 30.8 |
| 11 : 0        | 132    | -1.19587 | 21.3144                  | 0.12958 | 16.5 | 17.2 | 17.6 | 18.8 | 19.6 | 21.3 | 23.4 | 24.7 | 27.3 | 28.4 | 31.0 |
| 11 : 1        | 133    | -1.20297 | 21.3988                  | 0.12976 | 16.5 | 17.3 | 17.7 | 18.9 | 19.7 | 21.4 | 23.5 | 24.8 | 27.4 | 28.6 | 31.1 |
| 11 : 2        | 134    | -1.21000 | 21.4835                  | 0.12991 | 16.6 | 17.3 | 17.8 | 19.0 | 19.8 | 21.5 | 23.6 | 24.9 | 27.5 | 28.7 | 31.3 |
| 11 : 3        | 135    | -1.21697 | 21.5686                  | 0.13004 | 16.7 | 17.4 | 17.8 | 19.0 | 19.8 | 21.6 | 23.7 | 25.0 | 27.6 | 28.8 | 31.5 |
| 11 : 4        | 136    | -1.22389 | 21.6540                  | 0.13016 | 16.7 | 17.5 | 17.9 | 19.1 | 19.9 | 21.7 | 23.8 | 25.1 | 27.8 | 29.0 | 31.6 |
| 11 : 5        | 137    | -1.23074 | 21.7397                  | 0.13025 | 16.8 | 17.5 | 18.0 | 19.2 | 20.0 | 21.7 | 23.9 | 25.2 | 27.9 | 29.1 | 31.8 |
| 11 : 6        | 138    | -1.23753 | 21.8256                  | 0.13032 | 16.9 | 17.6 | 18.0 | 19.3 | 20.1 | 21.8 | 24.0 | 25.3 | 28.0 | 29.2 | 31.9 |
| 11 : 7        | 139    | -1.24427 | 21.9117                  | 0.13038 | 16.9 | 17.7 | 18.1 | 19.3 | 20.2 | 21.9 | 24.0 | 25.4 | 28.1 | 29.4 | 32.1 |
| 11 : 8        | 140    | -1.25095 | 21.9980                  | 0.13041 | 17.0 | 17.8 | 18.2 | 19.4 | 20.2 | 22.0 | 24.1 | 25.5 | 28.2 | 29.5 | 32.2 |
| 11 : 9        | 141    | -1.25757 | 22.0845                  | 0.13043 | 17.1 | 17.8 | 18.3 | 19.5 | 20.3 | 22.1 | 24.2 | 25.6 | 28.4 | 29.6 | 32.4 |
| 11 : 10       | 142    | -1.26414 | 22.1710                  | 0.13043 | 17.1 | 17.9 | 18.3 | 19.6 | 20.4 | 22.2 | 24.3 | 25.7 | 28.5 | 29.7 | 32.5 |
| 11 : 11       | 143    | -1.27064 | 22.2574                  | 0.13041 | 17.2 | 18.0 | 18.4 | 19.6 | 20.5 | 22.3 | 24.4 | 25.8 | 28.6 | 29.9 | 32.6 |
| 12 : 0        | 144    | -1.27709 | 22.3438                  | 0.13037 | 17.3 | 18.1 | 18.5 | 19.7 | 20.6 | 22.3 | 24.5 | 25.9 | 28.7 | 30.0 | 32.8 |
| 12 : 1        | 145    | -1.28349 | 22.4300                  | 0.13032 | 17.4 | 18.1 | 18.6 | 19.8 | 20.6 | 22.4 | 24.6 | 26.0 | 28.8 | 30.1 | 32.9 |
| 12 : 2        | 146    | -1.28983 | 22.5161                  | 0.13025 | 17.4 | 18.2 | 18.6 | 19.9 | 20.7 | 22.5 | 24.7 | 26.1 | 28.9 | 30.2 | 33.1 |
| 12 : 3        | 147    | -1.29611 | 22.6018                  | 0.13017 | 17.5 | 18.3 | 18.7 | 20.0 | 20.8 | 22.6 | 24.8 | 26.2 | 29.0 | 30.3 | 33.2 |
| 12 : 4        | 148    | -1.30233 | 22.6872                  | 0.13008 | 17.6 | 18.3 | 18.8 | 20.0 | 20.9 | 22.7 | 24.9 | 26.3 | 29.2 | 30.5 | 33.3 |
| 12 : 5        | 149    | -1.30850 | 22.7722                  | 0.12997 | 17.7 | 18.4 | 18.9 | 20.1 | 21.0 | 22.8 | 25.0 | 26.4 | 29.3 | 30.6 | 33.5 |
| 12 : 6        | 150    | -1.31461 | 22.8568                  | 0.12985 | 17.7 | 18.5 | 18.9 | 20.2 | 21.0 | 22.9 | 25.1 | 26.5 | 29.4 | 30.7 | 33.6 |
| 12 : 7        | 151    | -1.32067 | 22.9408                  | 0.12971 | 17.8 | 18.6 | 19.0 | 20.3 | 21.1 | 22.9 | 25.2 | 26.6 | 29.5 | 30.8 | 33.7 |
| 12 : 8        | 152    | -1.32667 | 23.0242                  | 0.12957 | 17.9 | 18.6 | 19.1 | 20.3 | 21.2 | 23.0 | 25.3 | 26.7 | 29.6 | 30.9 | 33.8 |
| 12 : 9        | 153    | -1.33261 | 23.1069                  | 0.12941 | 17.9 | 18.7 | 19.2 | 20.4 | 21.3 | 23.1 | 25.4 | 26.8 | 29.7 | 31.0 | 33.9 |
| 12 : 10       | 154    | -1.33850 | 23.1889                  | 0.12925 | 18.0 | 18.8 | 19.2 | 20.5 | 21.4 | 23.2 | 25.4 | 26.9 | 29.8 | 31.1 | 34.1 |
| 12 : 11       | 155    | -1.34434 | 23.2701                  | 0.12907 | 18.1 | 18.9 | 19.3 | 20.6 | 21.4 | 23.3 | 25.5 | 27.0 | 29.9 | 31.2 | 34.2 |
| 13 : 0        | 156    | -1.35012 | 23.3505                  | 0.12889 | 18.2 | 18.9 | 19.4 | 20.7 | 21.5 | 23.4 | 25.6 | 27.1 | 30.0 | 31.3 | 34.3 |
| 13 : 1        | 157    | -1.35584 | 23.4301                  | 0.12870 | 18.2 | 19.0 | 19.5 | 20.7 | 21.6 | 23.4 | 25.7 | 27.1 | 30.1 | 31.4 | 34.4 |
| 13 : 2        | 158    | -1.36150 | 23.5087                  | 0.12850 | 18.3 | 19.1 | 19.5 | 20.8 | 21.7 | 23.5 | 25.8 | 27.2 | 30.2 | 31.5 | 34.5 |
| 13 : 3        | 159    | -1.36711 | 23.5865                  | 0.12830 | 18.4 | 19.1 | 19.6 | 20.9 | 21.7 | 23.6 | 25.9 | 27.3 | 30.3 | 31.6 | 34.6 |
| 13 : 4        | 160    | -1.37265 | 23.6632                  | 0.12809 | 18.4 | 19.2 | 19.7 | 20.9 | 21.8 | 23.7 | 25.9 | 27.4 | 30.3 | 31.7 | 34.7 |
| 13 : 5        | 161    | -1.37814 | 23.7390                  | 0.12787 | 18.5 | 19.3 | 19.7 | 21.0 | 21.9 | 23.7 | 26.0 | 27.5 | 30.4 | 31.8 | 34.8 |
| 13 : 6        | 162    | -1.38357 | 23.8137                  | 0.12766 | 18.6 | 19.4 | 19.8 | 21.1 | 22.0 | 23.8 | 26.1 | 27.6 | 30.5 | 31.9 | 34.9 |
| 13 : 7        | 163    | -1.38894 | 23.8873                  | 0.12744 | 18.6 | 19.4 | 19.9 | 21.2 | 22.0 | 23.9 | 26.2 | 27.6 | 30.6 | 32.0 | 35.0 |
| 13 : 8        | 164    | -1.39425 | 23.9598                  | 0.12721 | 18.7 | 19.5 | 19.9 | 21.2 | 22.1 | 24.0 | 26.3 | 27.7 | 30.7 | 32.1 | 35.1 |
| 13 : 9        | 165    | -1.39950 | 24.0312                  | 0.12699 | 18.8 | 19.6 | 20.0 | 21.3 | 22.2 | 24.0 | 26.3 | 27.8 | 30.8 | 32.1 | 35.2 |
| 13 : 10       | 166    | -1.40469 | 24.1013                  | 0.12676 | 18.8 | 19.6 | 20.1 | 21.4 | 22.2 | 24.1 | 26.4 | 27.9 | 30.8 | 32.2 | 35.3 |
| 13 : 11       | 167    | -1.40982 | 24.1703                  | 0.12653 | 18.9 | 19.7 | 20.1 | 21.4 | 22.3 | 24.2 | 26.5 | 27.9 | 30.9 | 32.3 | 35.4 |
| 14 : 0        | 168    | -1.41489 | 24.2379                  | 0.12630 | 19.0 | 19.7 | 20.2 | 21.5 | 22.4 | 24.2 | 26.5 | 28.0 | 31.0 | 32.4 | 35.4 |
| 14 : 1        | 169    | -1.41989 | 24.3043                  | 0.12608 | 19.0 | 19.8 | 20.3 | 21.6 | 22.4 | 24.3 | 26.6 | 28.1 | 31.1 | 32.5 | 35.5 |
| 14 : 2        | 170    | -1.42484 | 24.3693                  | 0.12585 | 19.1 | 19.9 | 20.3 | 21.6 | 22.5 | 24.4 | 26.7 | 28.2 | 31.1 | 32.5 | 35.6 |
| 14 : 3        | 171    | -1.42971 | 24.4330                  | 0.12563 | 19.1 | 19.9 | 20.4 | 21.7 | 22.6 | 24.4 | 26.7 | 28.2 | 31.2 | 32.6 | 35.7 |
| 14 : 4        | 172    | -1.43453 | 24.4954                  | 0.12541 | 19.2 | 20.0 | 20.4 | 21.7 | 22.6 | 24.5 | 26.8 | 28.3 | 31.3 | 32.7 | 35.7 |
| 14 : 5        | 173    | -1.43928 | 24.5565                  | 0.12519 | 19.3 | 20.0 | 20.5 | 21.8 | 22.7 | 24.6 | 26.9 | 28.3 | 31.4 | 32.7 | 35.8 |
| 14 : 6        | 174    | -1.44397 | 24.6163                  | 0.12498 | 19.3 | 20.1 | 20.6 | 21.9 | 22.7 | 24.6 | 26.9 | 28.4 | 31.4 | 32.8 | 35.9 |
| 14 : 7        | 175    | -1.44859 | 24.6747                  | 0.12476 | 19.4 | 20.2 | 20.6 | 21.9 | 22.8 | 24.7 | 27.0 | 28.5 | 31.5 | 32.9 | 36.0 |
| 14 : 8        | 176    | -1.45315 | 24.7318                  | 0.12456 | 19.4 | 20.2 | 20.7 | 22.0 | 22.8 | 24.7 | 27.0 | 28.5 | 31.5 | 32.9 | 36.0 |

| 5 to 19 years |        |          | Percentiles (MUAC in cm) |         |      |      |      |      |      |      |      |      |      |      |      |
|---------------|--------|----------|--------------------------|---------|------|------|------|------|------|------|------|------|------|------|------|
| Year : Month  | Months | L        | M                        | S       | 1st  | 3rd  | 5th  | 15th | 25th | 50th | 75th | 85th | 95th | 97th | 99th |
| 14 : 9        | 177    | -1.45764 | 24.7876                  | 0.12436 | 19.5 | 20.3 | 20.7 | 22.0 | 22.9 | 24.8 | 27.1 | 28.6 | 31.6 | 33.0 | 36.1 |
| 14 : 10       | 178    | -1.46207 | 24.8421                  | 0.12416 | 19.5 | 20.3 | 20.8 | 22.1 | 23.0 | 24.8 | 27.2 | 28.6 | 31.7 | 33.1 | 36.2 |
| 14 : 11       | 179    | -1.46642 | 24.8952                  | 0.12397 | 19.6 | 20.4 | 20.8 | 22.1 | 23.0 | 24.9 | 27.2 | 28.7 | 31.7 | 33.1 | 36.2 |
| 15 : 0        | 180    | -1.47072 | 24.9470                  | 0.12378 | 19.6 | 20.4 | 20.9 | 22.2 | 23.1 | 24.9 | 27.3 | 28.8 | 31.8 | 33.2 | 36.3 |
| 15 : 1        | 181    | -1.47494 | 24.9975                  | 0.12360 | 19.7 | 20.5 | 20.9 | 22.2 | 23.1 | 25.0 | 27.3 | 28.8 | 31.8 | 33.2 | 36.3 |
| 15 : 2        | 182    | -1.47910 | 25.0466                  | 0.12343 | 19.7 | 20.5 | 21.0 | 22.3 | 23.2 | 25.0 | 27.4 | 28.9 | 31.9 | 33.3 | 36.4 |
| 15 : 3        | 183    | -1.48319 | 25.0944                  | 0.12326 | 19.8 | 20.6 | 21.0 | 22.3 | 23.2 | 25.1 | 27.4 | 28.9 | 31.9 | 33.3 | 36.5 |
| 15 : 4        | 184    | -1.48721 | 25.1409                  | 0.12311 | 19.8 | 20.6 | 21.1 | 22.4 | 23.2 | 25.1 | 27.5 | 29.0 | 32.0 | 33.4 | 36.5 |
| 15 : 5        | 185    | -1.49116 | 25.1861                  | 0.12296 | 19.8 | 20.6 | 21.1 | 22.4 | 23.3 | 25.2 | 27.5 | 29.0 | 32.0 | 33.4 | 36.6 |
| 15 : 6        | 186    | -1.49504 | 25.2299                  | 0.12281 | 19.9 | 20.7 | 21.1 | 22.5 | 23.3 | 25.2 | 27.6 | 29.1 | 32.1 | 33.5 | 36.6 |
| 15 : 7        | 187    | -1.49886 | 25.2725                  | 0.12268 | 19.9 | 20.7 | 21.2 | 22.5 | 23.4 | 25.3 | 27.6 | 29.1 | 32.1 | 33.5 | 36.7 |
| 15 : 8        | 188    | -1.50260 | 25.3139                  | 0.12255 | 20.0 | 20.8 | 21.2 | 22.5 | 23.4 | 25.3 | 27.6 | 29.1 | 32.2 | 33.6 | 36.7 |
| 15 : 9        | 189    | -1.50628 | 25.3541                  | 0.12243 | 20.0 | 20.8 | 21.3 | 22.6 | 23.5 | 25.4 | 27.7 | 29.2 | 32.2 | 33.6 | 36.8 |
| 15 : 10       | 190    | -1.50989 | 25.3931                  | 0.12232 | 20.0 | 20.8 | 21.3 | 22.6 | 23.5 | 25.4 | 27.7 | 29.2 | 32.3 | 33.7 | 36.8 |
| 15 : 11       | 191    | -1.51343 | 25.4309                  | 0.12222 | 20.1 | 20.9 | 21.3 | 22.6 | 23.5 | 25.4 | 27.8 | 29.3 | 32.3 | 33.7 | 36.9 |
| 16 : 0        | 192    | -1.51691 | 25.4676                  | 0.12213 | 20.1 | 20.9 | 21.4 | 22.7 | 23.6 | 25.5 | 27.8 | 29.3 | 32.4 | 33.8 | 36.9 |
| 16 : 1        | 193    | -1.52031 | 25.5032                  | 0.12204 | 20.1 | 20.9 | 21.4 | 22.7 | 23.6 | 25.5 | 27.8 | 29.3 | 32.4 | 33.8 | 37.0 |
| 16 : 2        | 194    | -1.52364 | 25.5377                  | 0.12196 | 20.2 | 21.0 | 21.4 | 22.8 | 23.6 | 25.5 | 27.9 | 29.4 | 32.4 | 33.9 | 37.0 |
| 16 : 3        | 195    | -1.52691 | 25.5711                  | 0.12189 | 20.2 | 21.0 | 21.5 | 22.8 | 23.7 | 25.6 | 27.9 | 29.4 | 32.5 | 33.9 | 37.1 |
| 16 : 4        | 196    | -1.53011 | 25.6035                  | 0.12183 | 20.2 | 21.0 | 21.5 | 22.8 | 23.7 | 25.6 | 28.0 | 29.5 | 32.5 | 34.0 | 37.1 |
| 16 : 5        | 197    | -1.53324 | 25.6348                  | 0.12177 | 20.3 | 21.1 | 21.5 | 22.8 | 23.7 | 25.6 | 28.0 | 29.5 | 32.6 | 34.0 | 37.2 |
| 16 : 6        | 198    | -1.53630 | 25.6652                  | 0.12173 | 20.3 | 21.1 | 21.6 | 22.9 | 23.8 | 25.7 | 28.0 | 29.5 | 32.6 | 34.0 | 37.2 |
| 16 : 7        | 199    | -1.53930 | 25.6946                  | 0.12169 | 20.3 | 21.1 | 21.6 | 22.9 | 23.8 | 25.7 | 28.0 | 29.6 | 32.6 | 34.1 | 37.3 |
| 16 : 8        | 200    | -1.54222 | 25.7231                  | 0.12166 | 20.3 | 21.1 | 21.6 | 22.9 | 23.8 | 25.7 | 28.1 | 29.6 | 32.7 | 34.1 | 37.3 |
| 16 : 9        | 201    | -1.54508 | 25.7507                  | 0.12164 | 20.4 | 21.2 | 21.6 | 23.0 | 23.8 | 25.8 | 28.1 | 29.6 | 32.7 | 34.2 | 37.4 |
| 16 : 10       | 202    | -1.54788 | 25.7774                  | 0.12163 | 20.4 | 21.2 | 21.7 | 23.0 | 23.9 | 25.8 | 28.1 | 29.7 | 32.8 | 34.2 | 37.4 |
| 16 : 11       | 203    | -1.55061 | 25.8033                  | 0.12162 | 20.4 | 21.2 | 21.7 | 23.0 | 23.9 | 25.8 | 28.2 | 29.7 | 32.8 | 34.2 | 37.4 |
| 17 : 0        | 204    | -1.55328 | 25.8284                  | 0.12162 | 20.4 | 21.2 | 21.7 | 23.0 | 23.9 | 25.8 | 28.2 | 29.7 | 32.8 | 34.3 | 37.5 |
| 17 : 1        | 205    | -1.55588 | 25.8527                  | 0.12163 | 20.4 | 21.3 | 21.7 | 23.0 | 23.9 | 25.9 | 28.2 | 29.7 | 32.9 | 34.3 | 37.5 |
| 17 : 2        | 206    | -1.55843 | 25.8763                  | 0.12165 | 20.5 | 21.3 | 21.7 | 23.1 | 24.0 | 25.9 | 28.2 | 29.8 | 32.9 | 34.3 | 37.6 |
| 17 : 3        | 207    | -1.56091 | 25.8991                  | 0.12167 | 20.5 | 21.3 | 21.8 | 23.1 | 24.0 | 25.9 | 28.3 | 29.8 | 32.9 | 34.4 | 37.6 |
| 17 : 4        | 208    | -1.56333 | 25.9213                  | 0.12170 | 20.5 | 21.3 | 21.8 | 23.1 | 24.0 | 25.9 | 28.3 | 29.8 | 33.0 | 34.4 | 37.7 |
| 17 : 5        | 209    | -1.56569 | 25.9429                  | 0.12174 | 20.5 | 21.3 | 21.8 | 23.1 | 24.0 | 25.9 | 28.3 | 29.9 | 33.0 | 34.4 | 37.7 |
| 17 : 6        | 210    | -1.56799 | 25.9638                  | 0.12178 | 20.5 | 21.3 | 21.8 | 23.1 | 24.0 | 26.0 | 28.3 | 29.9 | 33.0 | 34.5 | 37.8 |
| 17 : 7        | 211    | -1.57024 | 25.9842                  | 0.12183 | 20.6 | 21.4 | 21.8 | 23.2 | 24.1 | 26.0 | 28.4 | 29.9 | 33.1 | 34.5 | 37.8 |
| 17 : 8        | 212    | -1.57243 | 26.0040                  | 0.12189 | 20.6 | 21.4 | 21.8 | 23.2 | 24.1 | 26.0 | 28.4 | 29.9 | 33.1 | 34.6 | 37.8 |
| 17 : 9        | 213    | -1.57456 | 26.0233                  | 0.12195 | 20.6 | 21.4 | 21.9 | 23.2 | 24.1 | 26.0 | 28.4 | 30.0 | 33.1 | 34.6 | 37.9 |
| 17 : 10       | 214    | -1.57664 | 26.0421                  | 0.12202 | 20.6 | 21.4 | 21.9 | 23.2 | 24.1 | 26.0 | 28.4 | 30.0 | 33.2 | 34.6 | 37.9 |
| 17 : 11       | 215    | -1.57867 | 26.0605                  | 0.12210 | 20.6 | 21.4 | 21.9 | 23.2 | 24.1 | 26.1 | 28.5 | 30.0 | 33.2 | 34.7 | 38.0 |
| 18 : 0        | 216    | -1.58064 | 26.0784                  | 0.12218 | 20.6 | 21.4 | 21.9 | 23.2 | 24.1 | 26.1 | 28.5 | 30.0 | 33.2 | 34.7 | 38.0 |
| 18 : 1        | 217    | -1.58256 | 26.0958                  | 0.12227 | 20.6 | 21.4 | 21.9 | 23.3 | 24.2 | 26.1 | 28.5 | 30.1 | 33.2 | 34.7 | 38.1 |
| 18 : 2        | 218    | -1.58443 | 26.1128                  | 0.12236 | 20.6 | 21.5 | 21.9 | 23.3 | 24.2 | 26.1 | 28.5 | 30.1 | 33.3 | 34.8 | 38.1 |
| 18 : 3        | 219    | -1.58625 | 26.1295                  | 0.12246 | 20.7 | 21.5 | 21.9 | 23.3 | 24.2 | 26.1 | 28.5 | 30.1 | 33.3 | 34.8 | 38.2 |
| 18 : 4        | 220    | -1.58803 | 26.1457                  | 0.12256 | 20.7 | 21.5 | 22.0 | 23.3 | 24.2 | 26.1 | 28.6 | 30.1 | 33.3 | 34.8 | 38.2 |
| 18 : 5        | 221    | -1.58975 | 26.1616                  | 0.12267 | 20.7 | 21.5 | 22.0 | 23.3 | 24.2 | 26.2 | 28.6 | 30.2 | 33.4 | 34.9 | 38.3 |
| 18 : 6        | 222    | -1.59143 | 26.1772                  | 0.12278 | 20.7 | 21.5 | 22.0 | 23.3 | 24.2 | 26.2 | 28.6 | 30.2 | 33.4 | 34.9 | 38.3 |
| 18 : 7        | 223    | -1.59307 | 26.1924                  | 0.12290 | 20.7 | 21.5 | 22.0 | 23.3 | 24.2 | 26.2 | 28.6 | 30.2 | 33.4 | 34.9 | 38.4 |
| 18 : 8        | 224    | -1.59466 | 26.2073                  | 0.12302 | 20.7 | 21.5 | 22.0 | 23.3 | 24.2 | 26.2 | 28.6 | 30.2 | 33.5 | 35.0 | 38.4 |
| 18 : 9        | 225    | -1.59621 | 26.2220                  | 0.12315 | 20.7 | 21.5 | 22.0 | 23.3 | 24.3 | 26.2 | 28.7 | 30.2 | 33.5 | 35.0 | 38.5 |
| 18 : 10       | 226    | -1.59771 | 26.2363                  | 0.12328 | 20.7 | 21.5 | 22.0 | 23.4 | 24.3 | 26.2 | 28.7 | 30.3 | 33.5 | 35.1 | 38.5 |
| 18 : 11       | 227    | -1.59918 | 26.2505                  | 0.12342 | 20.7 | 21.5 | 22.0 | 23.4 | 24.3 | 26.3 | 28.7 | 30.3 | 33.6 | 35.1 | 38.5 |
| 19 : 0        | 228    | -1.60061 | 26.2644                  | 0.12356 | 20.7 | 21.6 | 22.0 | 23.4 | 24.3 | 26.3 | 28.7 | 30.3 | 33.6 | 35.1 | 38.6 |
